# Supplementary material for: Activated carbon for aerobic oxidation: Benign approach toward 2-benzoylbenzimidazoles and 2-benzoylbenzoxazoles synthesis
Source: PubMed Central journal article supplement (PMC4603700; doi:10.1038/srep10360), 2015-06-04

Supplementary Information

**Activated carbon for aerobic oxidation: Benign approach toward 2-benzoylbenzimidazoles and 2-benzoylbenzoxazoles synthesis**

Kai Bao<sup>1,2</sup>, Fuqing Li<sup>1</sup>, Hanjing Liu<sup>1</sup>, Zhiwei Wang<sup>1</sup>, Qirong Shen<sup>1</sup>, Jian Wang<sup>1</sup>, and Weige Zhang<sup>1\*</sup>

<sup>1</sup>Key Laboratory of Structure-Based Drug Design & Discovery, Ministry of Education

Shenyang Pharmaceutical University, 103 Wenhua Road, Shenyang 110016 (China)

<sup>2</sup>Division of Hematology/Oncology, Department of Medicine, Beth Israel Deaconess Medical Center, Harvard Medical School, Boston, MA 02215 (USA)

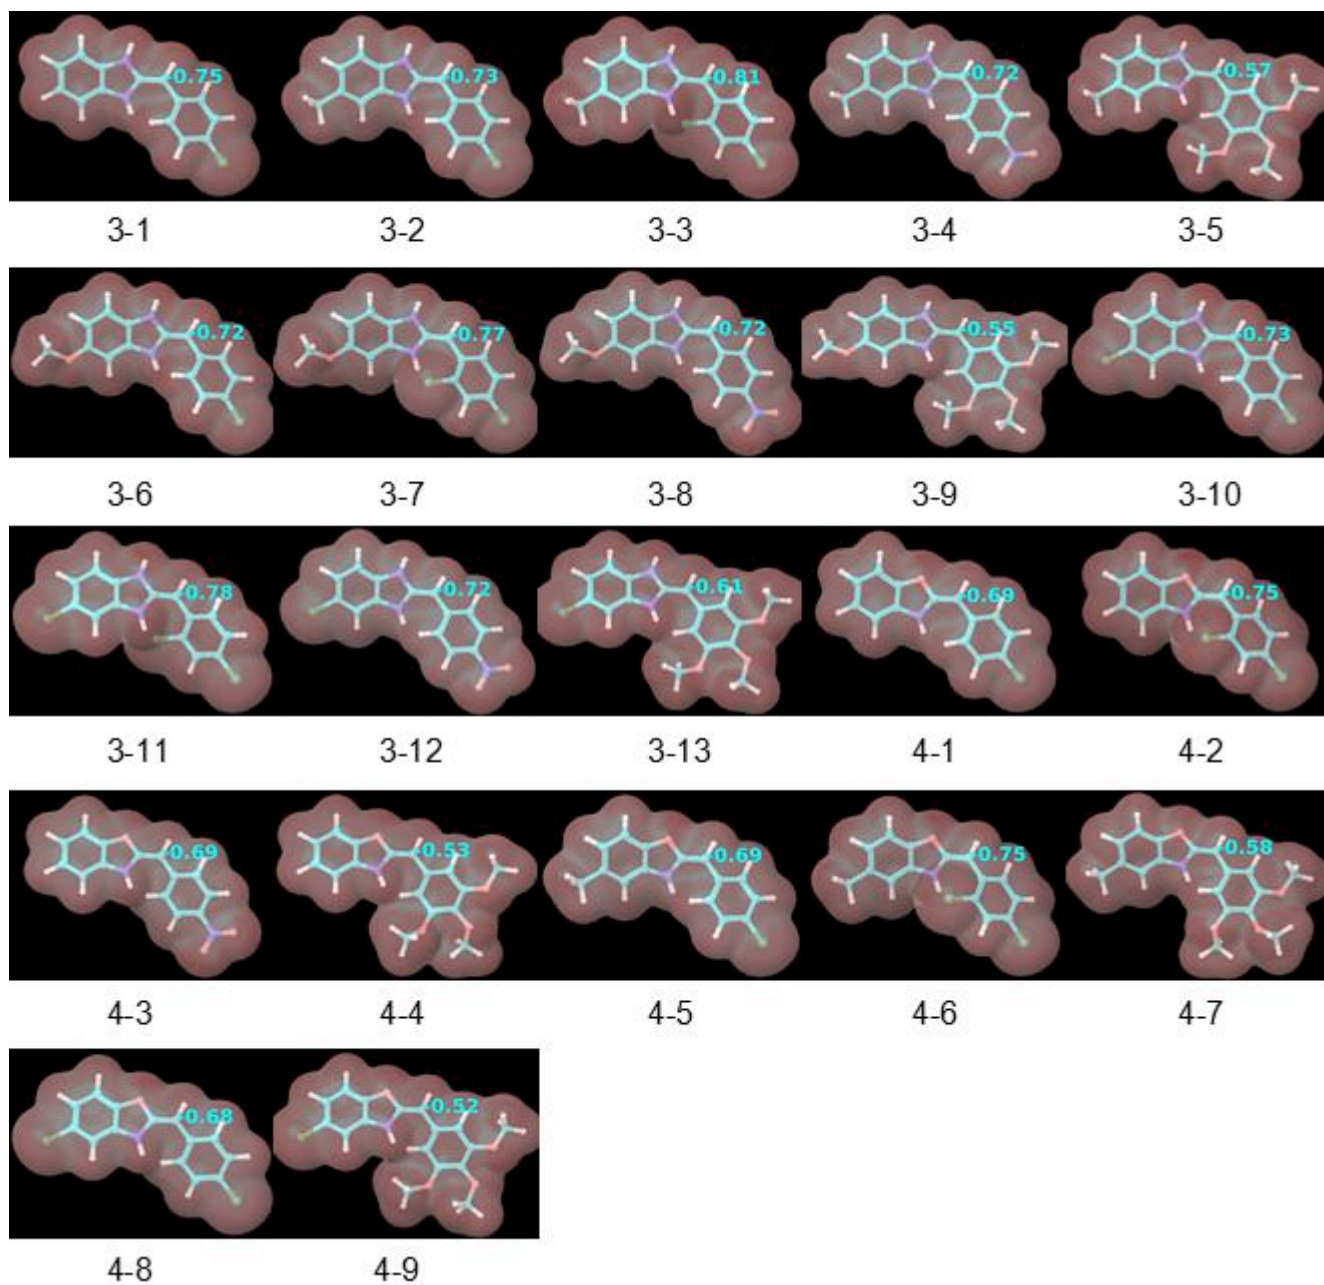

Figure S1: Electric density of the substrates in Table 3 and 4 in the form of the enamine tautomer.

Method: Calculations of the electric density were carried out with the Jaguar 4.0 software within Schrodinger (2014.1) using the B3LYP hybrid density functional method. Geometries were optimized using the 6-31G (d) basis set, and single point energies were calculated using the 6-311+G (d,p) basis set.

Table S1. Comparison of reported procedures for the benzylic oxidation of 2-benzylbenzimidazoles

a.

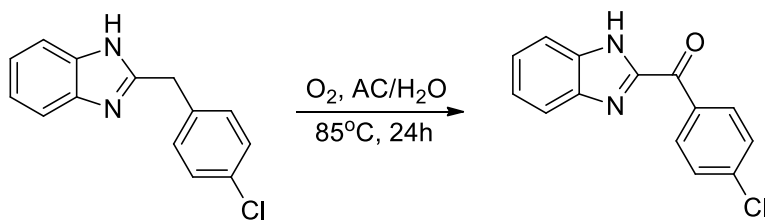

| Raw Materials Used |               | Product and Waste |           |
|--------------------|---------------|-------------------|-----------|
| Compound <b>4</b>  | 485.40 mg     | Compound <b>6</b> | 446.64 mg |
| AC <b>III</b>      | 60.00 mg      | Aqueous waste     | 5.00 g    |
| Water              | 5.00 g (5 mL) |                   |           |
| Total              | 5.54 g        | Total             | 5.45 g    |

E Factor (E) = (5 g of waste produced / 446.64 mg of product) = 11.19

Mass Intensity = (5.54 g of raw material used / 446.64 mg of product) = 12.40

b.

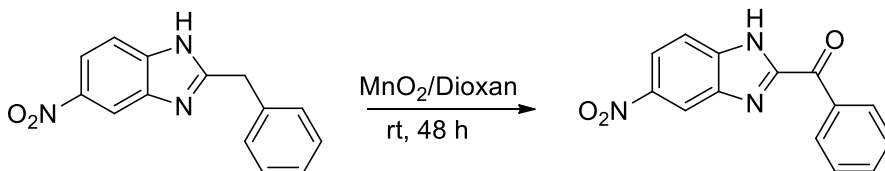

H. C. Ooi and H. Suschitzky, *J. Chem. Soc., Perkin Trans. 1*, 1982, 2871.

| Raw Materials Used |                 | Product and Waste |         |
|--------------------|-----------------|-------------------|---------|
| Compound <b>5</b>  | 0.20 g          | Compound <b>4</b> | 0.16 g  |
| MnO <sub>2</sub>   | 1.00 g          | Solid waste       | 1.00 g  |
| Dioxan             | 10.30 g (10 mL) | Organic waste     | 10.30 g |
| Total              | 11.50 g         | Total             | 11.46 g |

E Factor (E) = (11.46 g of waste produced / 0.16 g of product) = 71.63

Mass Intensity = (11.50 g of raw material used / 0.16 g of product) = 71.88

c.

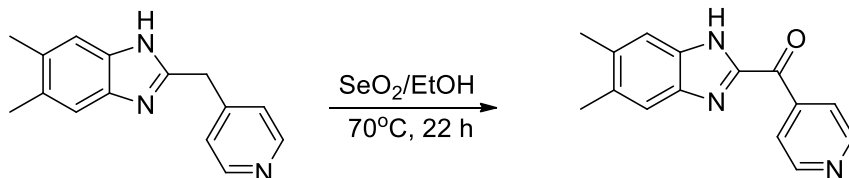

E. Alcalde, M. Gisbert, J. M. Pons and L. Perez-Garcia, *Tetrahedron*, 1996, 52, 15197.

| Raw Materials Used |                 | Product and Waste   |         |
|--------------------|-----------------|---------------------|---------|
| Compound <b>8b</b> | 3.30 g          | Compound <b>11b</b> | 1.32 g  |
| SeO <sub>2</sub>   | 1.76 g          | Organic waste       | 60.94 g |
| EtOH               | 59.18 g (75 mL) |                     |         |
| Total              | 64.24 g         | Total               | 62.26 g |

E Factor (E) = (60.94 g of waste produced / 1.32 g of product) = 46.17

Mass Intensity = (64.24 g of raw material used / 1.32 g of product) = 48.67

d.

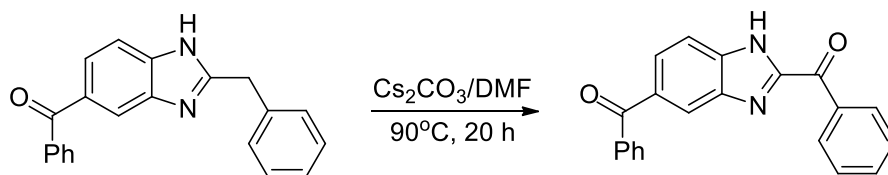

A. D. Santos, L. E. Kaïm and L. Grimaud, *Org. Biomol. Chem.*, 2013, 11, 3282.

| Raw Materials Used       |               | Product and Waste  |          |
|--------------------------|---------------|--------------------|----------|
| Compound <b>3d</b>       | 62.47 mg      | Compound <b>4d</b> | 47.65 mg |
| $\text{Cs}_2\text{CO}_3$ | 65.16 mg      | Organic waste      | 1.00 g   |
| DMF                      | 0.94 g (1 mL) |                    |          |
| Total                    | 1.07 g        | Total              | 1.05 g   |

E Factor (E) = (1.00 g of waste produced / 47.65 mg of product) = 20.99

Mass Intensity = (1.07 g of raw material used / 47.65 mg of product) = 22.46

Note:

1. >98 % catalyst recovered in our method.
2. Calculation did not consider for solvent used for column chromatography.



## 2-Benzoylbenzimidazoles

### 2-(4-Chloro)benzoylbenzimidazole (6, Table 3, entry 1)

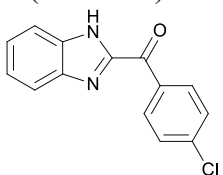

M. p. 226-228°C;  $^1\text{H-NMR}$  (600MHz, DMSO- $d_6$ ):  $\delta$ =13.54 (s, 1H), 8.61 (d, J=8.58 Hz, 2H), 7.87 (s, 1H), 7.66 (d, J=8.58 Hz, 2H), 7.60 (s, 1H), 7.40 (s, 1H), 7.32 (s, 1H);  $^{13}\text{C-NMR}$  (DMSO- $d_6$ ):  $\delta$ =182.6, 148.2, 143.6, 139.2, 134.7, 133.2, 129.1, 126.4, 123.8, 121.8, 113.3; MS:  $m/z$  (%): 257.0 ( $[\text{M}+\text{H}]^+$ ).

### 2-(4-Chlorohydroxybenzyl)-benzo[d]imidazole (5)

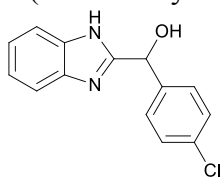

$^1\text{H-NMR}$  (600MHz, DMSO- $d_6$ ):  $\delta$ =7.41 (m, 2H), 7.23 (d, J=7.15 Hz, 2H), 7.18 (m, 2H), 7.13 (d, J=7.15 Hz, 2H); MS:  $m/z$  (%): 259.0 ( $[\text{M}+\text{H}]^+$ ).

### 2-(4-Chloro)benzoyl-5-methylbenzimidazole (Table 3, entry 2)

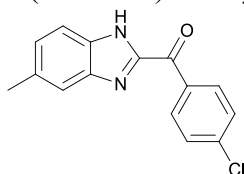

M. p. 200-203°C;  $^1\text{H-NMR}$  (300MHz, DMSO- $d_6$ ):  $\delta$ =10.54 (s, 1H), 8.66 (d, J=8.60 Hz, 2H), 7.82 (d, J=8.45 Hz, 1H), 7.53 (d, J=8.60 Hz, 2H), 7.20 (d, J=8.45 Hz, 1H), 2.52 (s, 3H);  $^{13}\text{C-NMR}$  (DMSO- $d_6$ ):  $\delta$ =182.4, 147.9, 144.1, 142.0, 139.1, 136.2, 134.7, 133.1, 129.0, 125.7, 121.4, 112.6, 22.0; MS:  $m/z$  (%): 268.9 ( $[\text{M}-\text{H}]^-$ ).

### 2-(2,4-Dichloro)benzoyl-5-methylbenzimidazole (Table 3, entry 3)

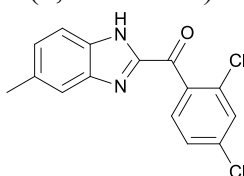

M. p. 223-225°C;  $^1\text{H-NMR}$  (300MHz, DMSO- $d_6$ ):  $\delta$ =13.61 (s, 1H), 7.84 (m, 2H), 7.63 (m, 2H), 7.46 (m, 1H), 7.19 (m, 1H), 2.44 (s, 3H);  $^{13}\text{C-NMR}$  (DMSO- $d_6$ ):  $\delta$ =185.3, 147.7, 136.5, 136.2, 136.1, 133.2, 132.5, 132.4, 129.9, 129.0, 127.6, 126.4, 121.2, 112.9, 21.9; MS:  $m/z$  (%): 305.0 ( $[\text{M}+\text{H}]^+$ ), 327.0 ( $[\text{M}+\text{Na}]^+$ ).

### 2-(4-Nitro)benzoyl-5-methylbenzimidazole (Table 3, entry 4)

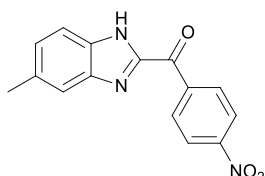

M. p. 212-214°C;  $^1\text{H-NMR}$  (300MHz, DMSO- $d_6$ ):  $\delta$ =13.53 (s, 1H), 8.72 (d, J=8.60 Hz, 2H), 8.41 (d, J=8.60 Hz, 2H), 7.19-7.70(m, 3H), 2.45 (s, 3H);  $^{13}\text{C-NMR}$  (DMSO- $d_6$ ):  $\delta$ =182.4, 150.3, 147.6, 144.1, 142.0, 141.0, 136.6, 135.1, 132.5, 125.9, 123.7, 121.5, 112.7, 22.0; MS:  $m/z$  (%): 279.9 ( $[\text{M}-\text{H}]^-$ ).

### 2-(3,4,5-Trimethoxy)benzoyl-5-methylbenzimidazole (Table 3, entry 5)

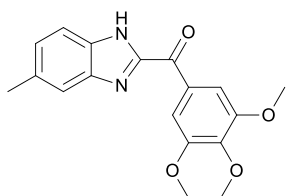

M. p. 195-197°C;  $^1\text{H-NMR}$  (300MHz,  $\text{DMSO-d}_6$ ):  $\delta$ =13.33 (s, 1H), 8.05 (s, 2H), 7.73 (d,  $J=8.45$  Hz, 2H), 7.39 (s, 1H), 7.15 (dd,  $J=8.45$  Hz,  $J=1.12$  Hz), 3.89 (s, 6H), 3.81 (s, 3H), 2.46 (s, 3H);  $^{13}\text{C-NMR}$  ( $\text{DMSO-d}_6$ ):  $\delta$ =182.1, 152.9, 148.2, 143.1, 134.8, 131.9, 129.1, 125.6, 121.4, 112.5, 109.3, 60.7, 56.6, 19.1; MS:  $m/z$  (%): 327.1 ( $[\text{M}+\text{H}]^+$ ), 349.1 ( $[\text{M}+\text{Na}]^+$ ).

#### 2-(4-Chloro)benzoyl-5-methoxybenzimidazole (Table 3, entry 6)

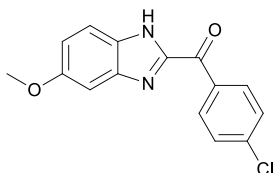

M. p. 169-171°C;  $^1\text{H-NMR}$  (300MHz,  $\text{DMSO-d}_6$ ):  $\delta$ =13.40 (s, 1H), 8.58 (d,  $J=7.05$  Hz, 2H), 7.65 (m, 3H), 6.98 (m, 1H), 3.8 (s, 3H);  $^{13}\text{C-NMR}$  ( $\text{DMSO-d}_6$ ):  $\delta$ =182.0, 159.3, 150.3, 147.3, 141.2, 138.6, 136.0, 132.5, 123.8, 122.8, 115.6, 94.2, 60.0; MS:  $m/z$  (%): 284.9 ( $[\text{M}-\text{H}]^-$ ).

#### 2-(2,4-Dichloro)benzoyl-5-methoxybenzimidazole (Table 3, entry 7)

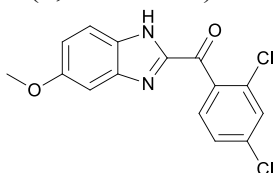

M. p. 202-203°C;  $^1\text{H-NMR}$  (300MHz,  $\text{DMSO-d}_6$ ):  $\delta$ =13.56 (s, 1H), 7.84 (d,  $J=8.30$ , 1H), 7.79 (d,  $J=1.91$ , 1H), 7.62 (m, 2H), 7.02 (m, 2H), 3.82 (s, 3H);  $^{13}\text{C-NMR}$  ( $\text{DMSO-d}_6$ ):  $\delta$ =184.6, 159.4, 147.3, 138.6, 136.3, 132.3, 131.9, 129.8, 129.1, 127.5, 122.9, 115.6, 94.2, 56.0; MS:  $m/z$  (%): 318.9 ( $[\text{M}-\text{H}]^-$ ).

#### 2-(4-Nitro)benzoyl-5-methoxybenzimidazole (Table 3, entry 8)

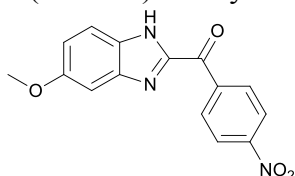

M. p. 216-218°C;  $^1\text{H-NMR}$  (300MHz,  $\text{DMSO-d}_6$ ):  $\delta$ =13.52 (s, 1H), 8.70 (d,  $J=8.67$  Hz, 2H), 8.41 (d,  $J=8.67$  Hz, 2H), 7.70 (s, 1H), 7.00 (m, 2H), 3.83 (s, 3H);  $^{13}\text{C-NMR}$  ( $\text{DMSO-d}_6$ ):  $\delta$ =181.8, 159.0, 147.6, 138.9, 138.5, 135.7, 134.8, 133.0, 128.9, 122.6, 115.2, 94.3, 55.9; MS:  $m/z$  (%): 295.9 ( $[\text{M}-\text{H}]^-$ ).

#### 2-(3,4,5-Trimethoxy)benzoyl-5-methoxybenzimidazole (Table 3, entry 9)

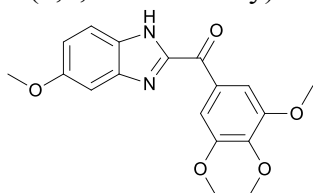

M. p. 150-153°C;  $^1\text{H-NMR}$  (300MHz,  $\text{DMSO-d}_6$ ):  $\delta$ =13.32 (s, 1H), 8.03 (s, 2H), 7.73 (d,  $J=8.81$  Hz, 1H), 7.00 (s, 1H), 6.95 (d,  $J=8.81$  Hz, 1H), 3.88 (s, 9H), 3.83 (s, 3H);  $^{13}\text{C-NMR}$  ( $\text{DMSO-d}_6$ ):  $\delta$ =181.6, 167.4, 158.8, 152.9, 142.9, 138.4, 135.5, 131.1, 129.1, 122.6, 114.9, 109.3, 94.3, 60.7, 56.5, 55.9; MS:  $m/z$  (%): 343.1 ( $[\text{M}+\text{H}]^+$ ), 365.0 ( $[\text{M}+\text{Na}]^+$ ).

#### 2-(4-Chloro)benzoyl-5-chlorobenzimidazole (Table 3, entry 10)

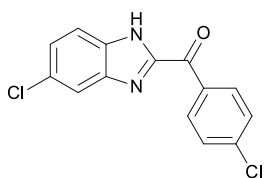

M. p. 224-226°C;  $^1\text{H-NMR}$  (300MHz, DMSO- $d_6$ ):  $\delta$ =8.57 (d, J=8.52 Hz, 2H), 7.77 (s, 1H), 7.74 (d, J=8.81 Hz, 1H), 7.66 (d, J=8.52 Hz, 2H), 7.37 (dd, J=8.81 Hz, J=1.69 Hz, 1H);  $^{13}\text{C-NMR}$  (DMSO- $d_6$ ):  $\delta$ =182.5, 149.2, 142.3, 139.4, 135.2, 134.4, 133.2, 130.7, 129.1, 124.4, 120.9, 112.9; MS:  $m/z$  (%): 288.8 ( $[\text{M-H}]^-$ ).

#### 2-(2,4-Dichlorobenzoyl)-5-chlorobenzimidazole (Table 3, entry 11)

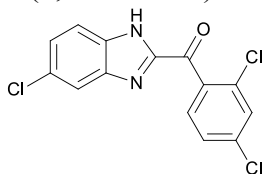

M. p. 182-184°C;  $^1\text{H-NMR}$  (300MHz, DMSO- $d_6$ ):  $\delta$ =13.76 (s, 1H), 7.78-7.90 (m, 2H), 7.63 (m, 3H), 7.40 (s, 1H);  $^{13}\text{C-NMR}$  (DMSO- $d_6$ ):  $\delta$ =185.0, 149.0, 144.3, 136.9, 135.6, 132.7, 132.5, 131.2, 130.0, 128.3, 127.5, 124.5, 121.2, 112.9; MS:  $m/z$  (%): 322.8 ( $[\text{M-H}]^-$ )

#### 2-(4-Nitrobenzoyl)-5-chlorobenzimidazole (Table 3, entry 12)

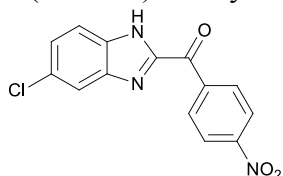

M. p. 234-235°C;  $^1\text{H-NMR}$  (300MHz, DMSO- $d_6$ ):  $\delta$ =13.61 (s, 1H), 8.68 (d, J=8.52 Hz, 2H), 8.37 (d, J=8.52 Hz, 2H), 7.75 (s, 2H), 7.36 (m, 1H);  $^{13}\text{C-NMR}$  (DMSO- $d_6$ ):  $\delta$ =181.9, 150.2, 148.6, 140.3, 132.4, 131.8, 130.5, 129.0, 124.4, 120.7, 114.6, 111.1; MS:  $m/z$  (%): 299.8 ( $[\text{M-H}]^-$ )

#### 2-(3,4,5-Trimethoxybenzoyl)-5-chlorobenzimidazole (Table 3, entry 13)

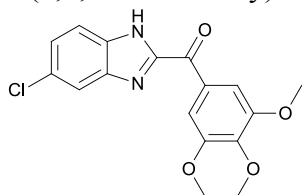

M. p. 201-203°C;  $^1\text{H-NMR}$  (300MHz, DMSO- $d_6$ ):  $\delta$ =13.64 (s, 1H), 8.01 (s, 2H), 7.39-7.83 (m, 3H), 3.89 (s, 6H), 3.81 (s, 3H);  $^{13}\text{C-NMR}$  (DMSO- $d_6$ ):  $\delta$ =180.0, 152.9, 149.6, 143.3, 132.2, 131.9, 130.7, 129.1, 125.4, 118.3, 109.3, 60.8, 56.6; MS:  $m/z$  (%): 347.1 ( $[\text{M+H}]^+$ ), 369.0 ( $[\text{M+Na}]^+$ ).

## 2-Benzoylbenzoxazoles

### 2-(4-Chloro)benzoylbenzoxazole (Table 4, entry 1)

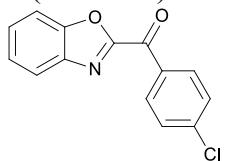

M.p. 106-108°C; <sup>1</sup>H-NMR (300MHz, CDCl<sub>3</sub>):  $\delta$ =8.57 (d, J=8.63 Hz, 2H), 7.94 (d, J=7.79 Hz, 1H), 7.70 (d, J=7.79, 1H), 7.45-7.58 (m, 4H); <sup>13</sup>C-NMR (CDCl<sub>3</sub>):  $\delta$ =179.1, 156.9, 150.4, 141.1, 140.7, 133.30, 132.5, 128.9, 128.6, 125.9, 122.4, 111.9; MS: *m/z* (%): 257.9 ([M+H]<sup>+</sup>), 279.9 ([M+Na]<sup>+</sup>)

### 2-(2,4-Dichloro)benzoylbenzoxazole (Table 4, entry 2)

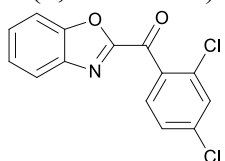

M.p. 102-103°C; <sup>1</sup>H-NMR (300MHz, CDCl<sub>3</sub>):  $\delta$ =7.90 (d, J=8.08, 1H), 7.78 (d, J=8.23, 1H), 7.70 (d, J=8.08 Hz, 1H), 7.59 (dd, J=7.41 Hz, J=1.22 Hz, 1H), 7.54 (dd, J=7.41 Hz, J=1.22 Hz, 1H), 7.49 (dd, J=8.23 Hz, J=1.79 Hz, 1H), 7.43 (m, 1H); <sup>13</sup>C-NMR (CDCl<sub>3</sub>):  $\delta$ =180.9, 157.0, 150.9, 140.8, 138.8, 134.0, 133.9, 131.9, 130.7, 129.0, 127.2, 126.1, 122.7, 112.0; MS: *m/z* (%): 291.9 ([M+H]<sup>+</sup>), 313.9 ([M+Na]<sup>+</sup>)

### 2-(4-Nitro)benzoylbenzoxazole (Table 4, entry 3)

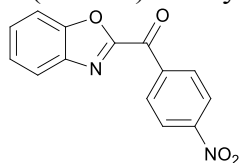

M.p. 106-108°C; <sup>1</sup>H-NMR (300MHz, CDCl<sub>3</sub>):  $\delta$ =8.78 (d, J=9.07 Hz, 2H), 8.41 (d, J=9.07 Hz, 2H), 7.98 (m, 1H), 7.73 (m, 1H), 7.61 (m, 1H), 7.52 (m, 1H); <sup>13</sup>C-NMR (CDCl<sub>3</sub>):  $\delta$ =178.7, 156.5, 150.8, 150.5, 140.6, 139.5, 132.1, 129.2, 126.2, 123.6, 122.7, 112.0; *m/z* (%): 269.1 ([M+H]<sup>+</sup>)

### 2-(3,4,5-Trimethoxy)benzoylbenzoxazole (Table 4, entry 4)

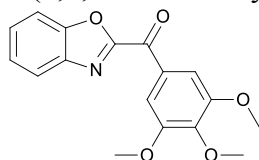

M.p. 89-91°C; <sup>1</sup>H-NMR (300MHz, CDCl<sub>3</sub>):  $\delta$ =7.96 (s, 2H), 7.94 (d, J=8.14 Hz, 1H), 7.73 (d, J=8.14 Hz, 1H), 7.53 (m, 2H), 4.00 (d, 9H); <sup>13</sup>C-NMR (CDCl<sub>3</sub>):  $\delta$ =178.9, 157.3, 152.9, 150.4, 144.0, 140.8, 129.9, 128.4, 125.7, 122.3, 111.9, 108.8, 61.1, 56.4; MS: *m/z* (%): 314.1 ([M+H]<sup>+</sup>), 336.0 ([M+Na]<sup>+</sup>)

### 2-(4-Chloro)benzoyl-5-methylbenzoxazole (Table 4, entry 5)

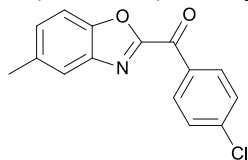

M.p. 107-108°C; <sup>1</sup>H-NMR (300MHz, CDCl<sub>3</sub>):  $\delta$ =8.54 (d, J=8.88 Hz, 2H), 7.70 (m, 1H), 7.57 (d, J=8.47 Hz, 1H), 7.52 (d, J=8.88 Hz, 2H), 7.36 (dd, J=8.47 Hz, J=1.30 Hz, 1H), 2.51 (s, 3H); <sup>13</sup>C-NMR (CDCl<sub>3</sub>):  $\delta$ =179.1, 157.0, 148.7, 141.0, 140.9, 135.9, 133.4, 132.4, 130.1, 128.9, 121.9, 111.2, 21.6; MS: *m/z* (%): 272.0 ([M+H]<sup>+</sup>)

### 2-(2,4-Dichloro)benzoyl-5-methylbenzoxazole (Table 4, entry 6)

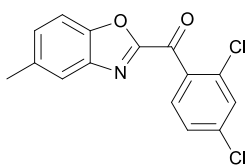

M.p. 105-107°C;  $^1\text{H-NMR}$  (300MHz,  $\text{CDCl}_3$ ):  $\delta$ =7.76 (d,  $J=8.37$  Hz, 1H), 7.66 (s, 1H), 7.55 (d,  $J=8.52$  Hz, 1H), 7.53 (d,  $J=1.87$  Hz, 1H), 7.34 (dd,  $J=8.37$  Hz,  $J=1.87$  Hz, 1H), 7.36(m, 1H), 2.50(s, 3H);  $^{13}\text{C-NMR}$  ( $\text{CDCl}_3$ ):  $\delta$ =180.9, 157.2, 149.2, 141.0, 138.7, 136.2, 134.1, 133.9, 131.9, 130.7, 130.5, 127.2, 122.1, 111.3, 21.6; MS:  $m/z$ (%): 306.0 ( $[\text{M}+\text{H}]^+$ ), 338.0 ( $[\text{M}+\text{Na}]^+$ ).

#### 2-(3,4,5-Trimethoxy)benzoyl-5-methylbenzoxazole (Table 4, entry 7)

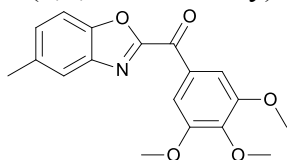

M. p. 100-102°C;  $^1\text{H-NMR}$  (300MHz,  $\text{CDCl}_3$ ):  $\delta$ =7.94 (s, 2H), 7.72 (s, 1H), 7.58 (d,  $J=8.55$  Hz, 1H), 7.37 (dd,  $J=8.55$  Hz,  $J=1.03$ , 1H), 3.99 (m, 9H), 2.52 (s, 3H);  $^{13}\text{C-NMR}$  ( $\text{CDCl}_3$ ):  $\delta$ =179.0, 157.4, 152.9, 148.7, 143.9, 141.0, 135.8, 130.0, 129.8, 121.9, 111.2, 108.8, 61.1, 56.3, 21.5; MS:  $m/z$  (%): 328.1 ( $[\text{M}+\text{H}]^+$ ), 350.0 ( $[\text{M}+\text{Na}]^+$ ).

#### 2-(4-Chloro)benzoyl-5-chlorobenzoxazole (Table 4, entry 8)

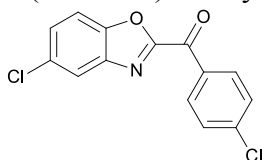

M. p. 112-114°C;  $^1\text{H-NMR}$  (300MHz,  $\text{CDCl}_3$ ):  $\delta$ =8.50 (d,  $J=8.63$  Hz, 2H), 7.90 (s, 1H), 7.61 (d,  $J=8.71$ , 1H), 7.51(m, 3H);  $^{13}\text{C-NMR}$  ( $\text{CDCl}_3$ ):  $\delta$ =178.7, 157.8, 148.9, 141.6, 141.4, 133.0, 132.5, 131.5, 129.1, 129.0, 122.1, 112.7; MS:  $m/z$  (%): 292.1 ( $[\text{M}+\text{H}]^+$ ), 313.9 ( $[\text{M}+\text{Na}]^+$ ).

#### 2-(3,4,5-Trimethoxy)benzoyl-5-chlorobenzoxazole (Table 4, entry 9)

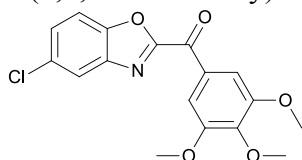

M. p. 107-108°C;  $^1\text{H-NMR}$  (300MHz,  $\text{CDCl}_3$ ):  $\delta$ =7.94 (m, 3H), 7.66 (d,  $J=8.88$  Hz, 1H), 7.53 (dd,  $J=8.88$  Hz,  $J=1.95$  Hz, 1H), 4.00 (m, 9H);  $^{13}\text{C-NMR}$  ( $\text{CDCl}_3$ ):  $\delta$ =178.5, 158.2, 153.0, 148.9, 144.3, 141.7, 131.3, 129.5, 128.8, 122.1, 112.7, 108.8, 61.1, 56.4; MS:  $m/z$  (%): 348.0 ( $[\text{M}+\text{H}]^+$ ), 370.0 ( $[\text{M}+\text{Na}]^+$ ).

# 2-(4-Chloro)benzoylbenzimidazole (6)

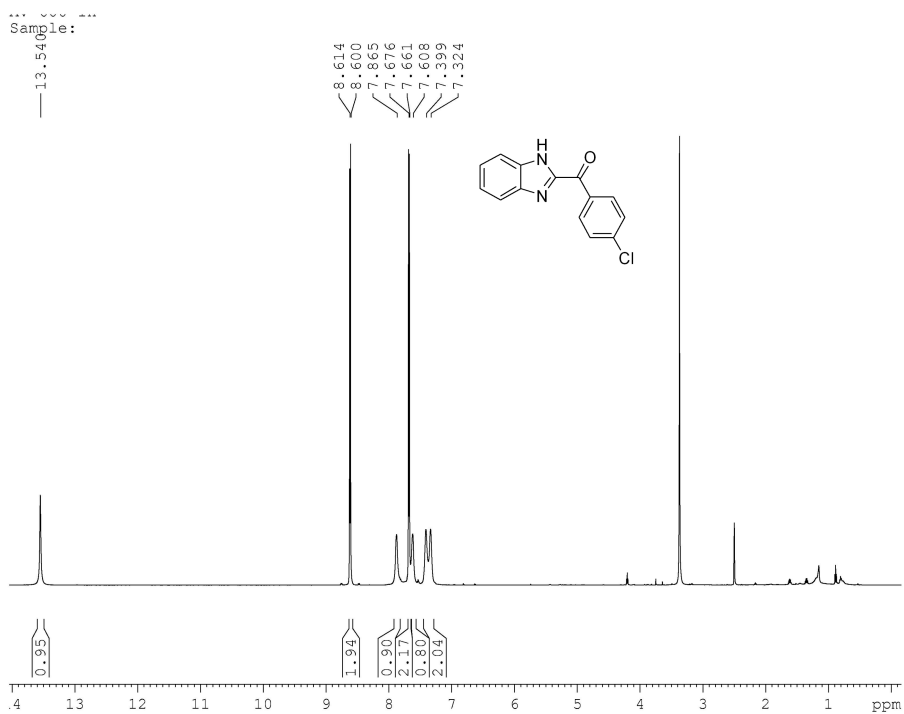

# 2-(4-Chloro)benzoylbenzimidazole (6)

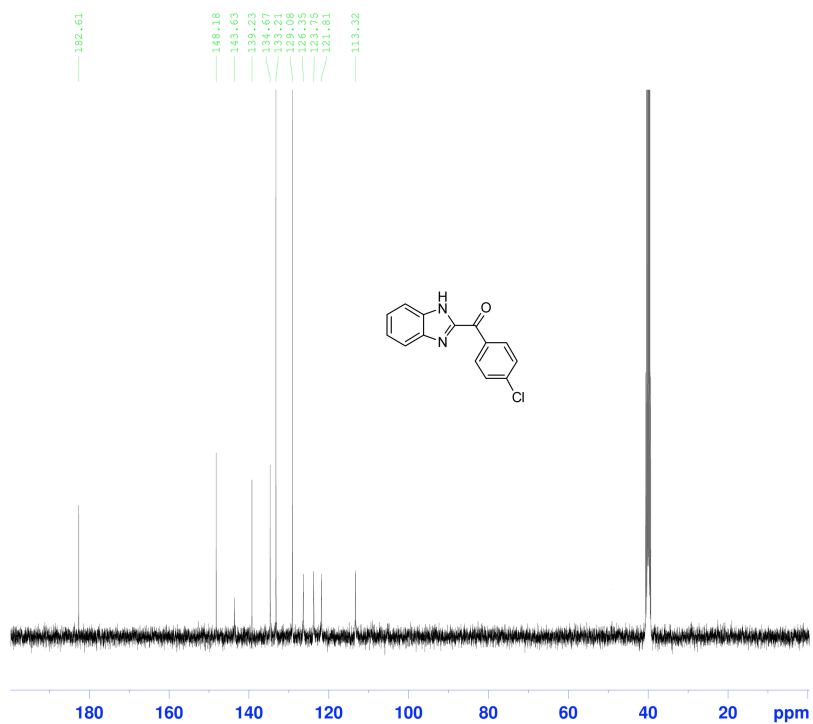

# 2-(4-Chlorohydroxybenzyl)-benzo[d]imidazole(5)

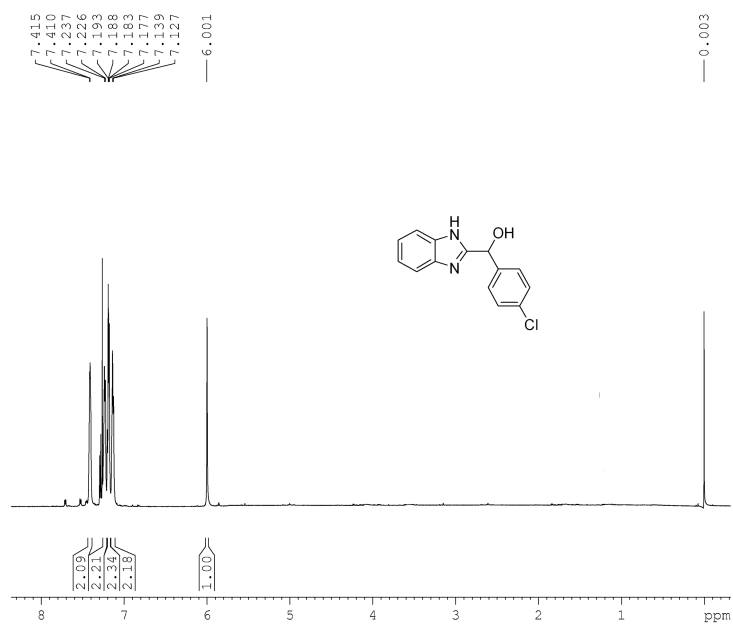



# 2-(4-Chloro)benzoyl-5-methylbenzimidazole

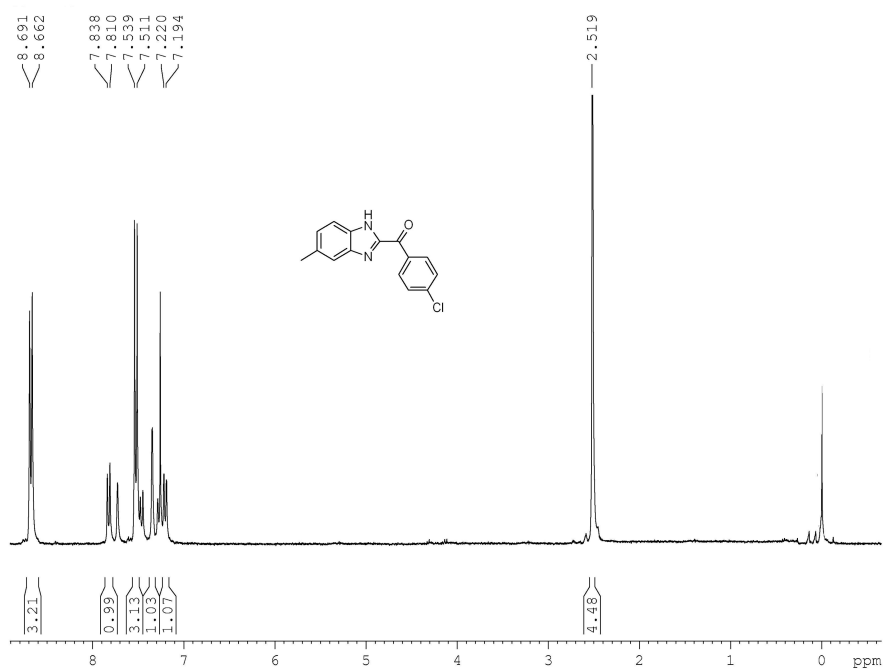

# 2-(4-Chloro)benzoyl-5-methylbenzimidazole

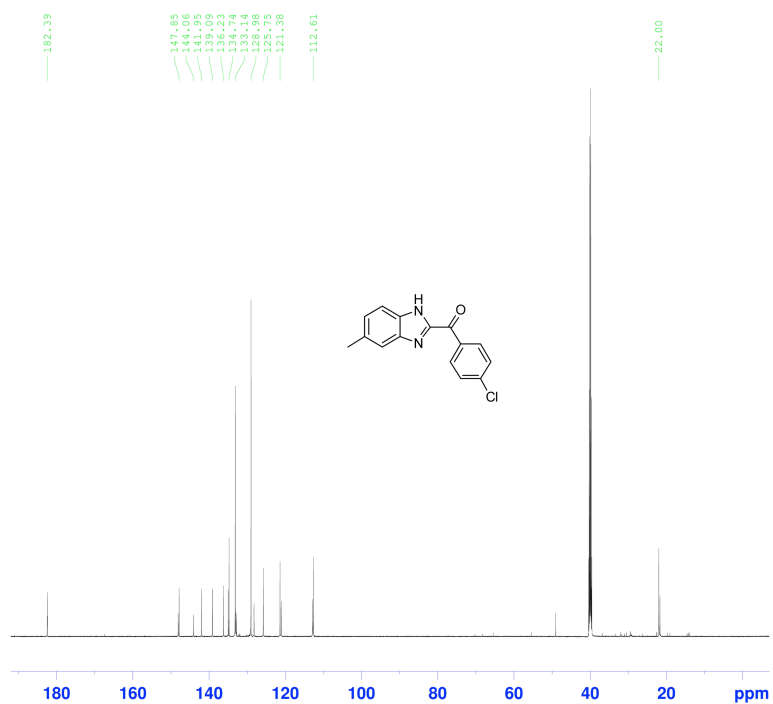

# 2-(2,4-Dichloro)benzoyl-5-methylbenzimidazole

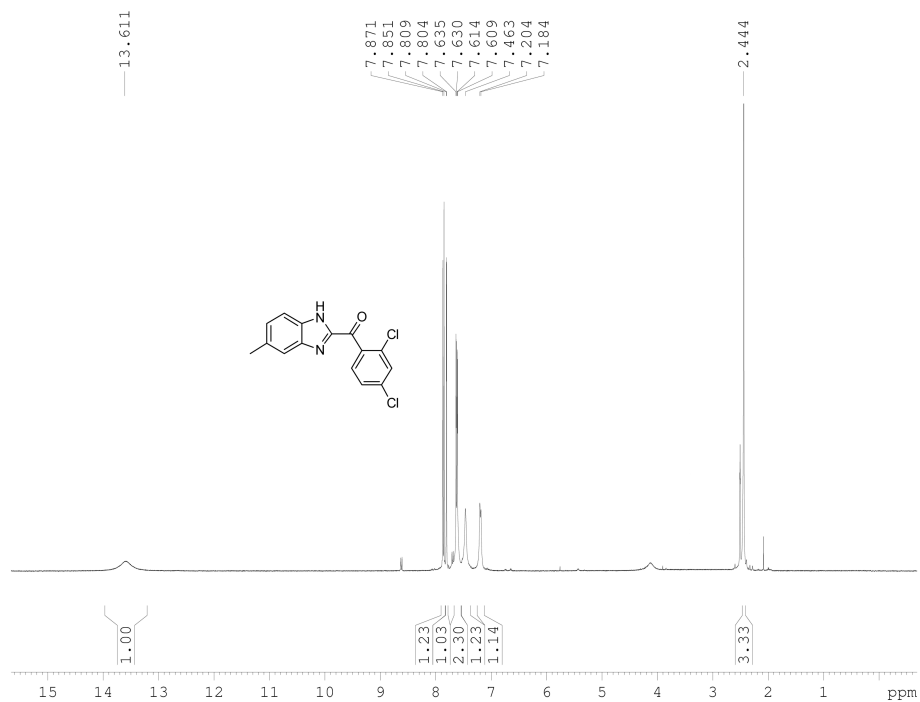

# 2-(2,4-Dichloro)benzoyl-5-methylbenzimidazole

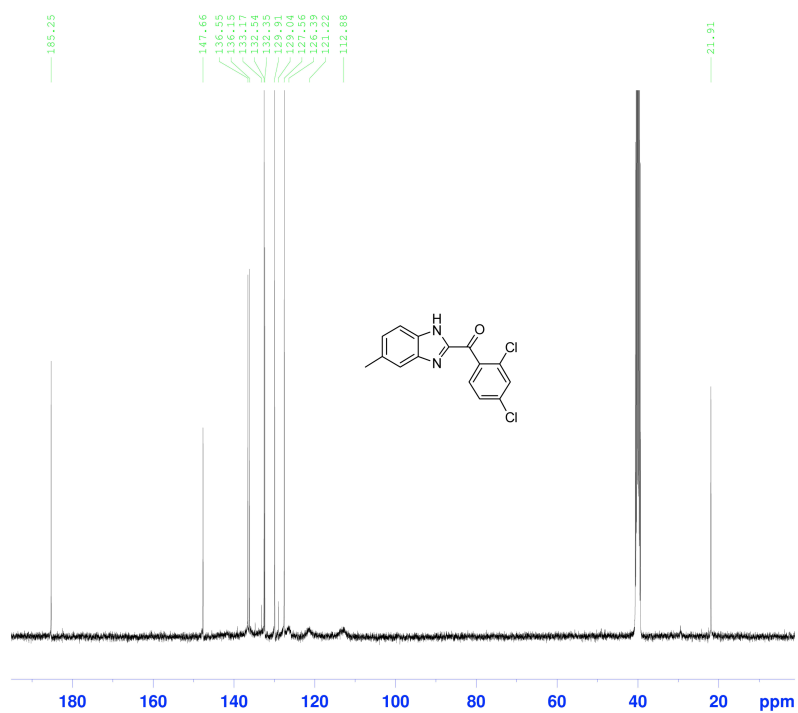

# 2-(4-Nitro)benzoyl-5-methylbenzimidazole

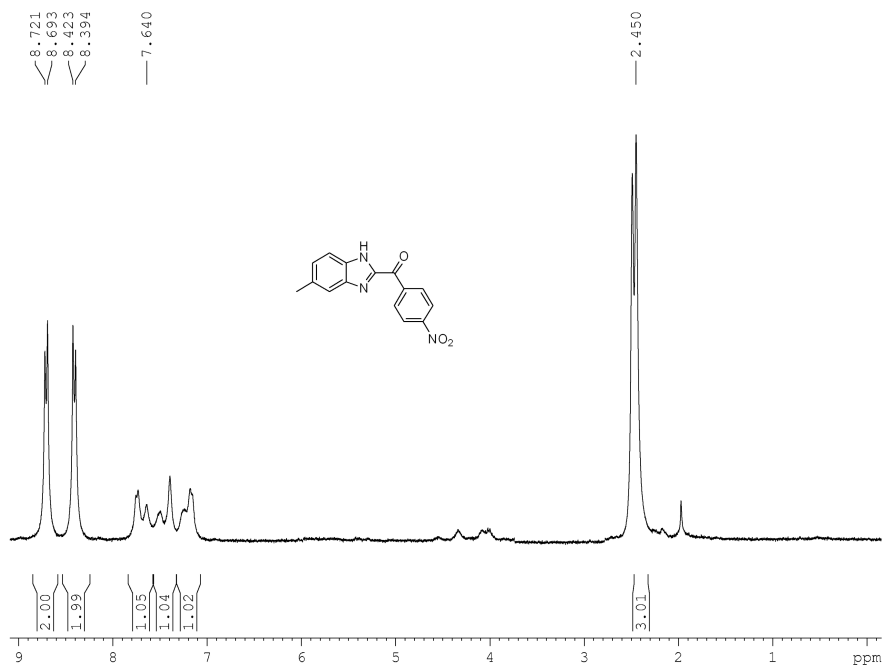

# 2-(4-Nitro)benzoyl-5-methylbenzimidazole

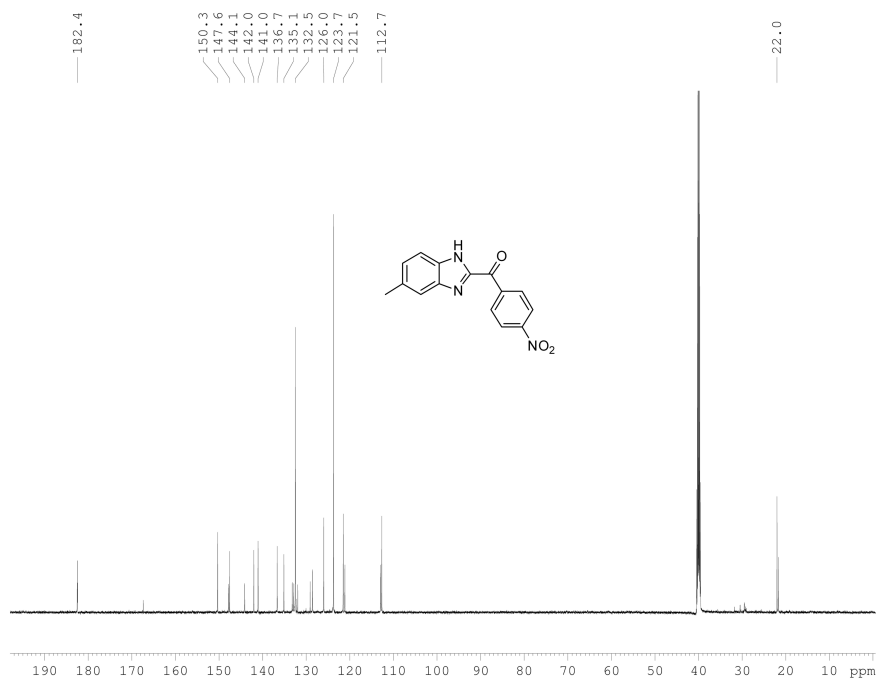

# 2-(3,4,5-Trimethoxybenzoyl)-5-methylbenzimidazole

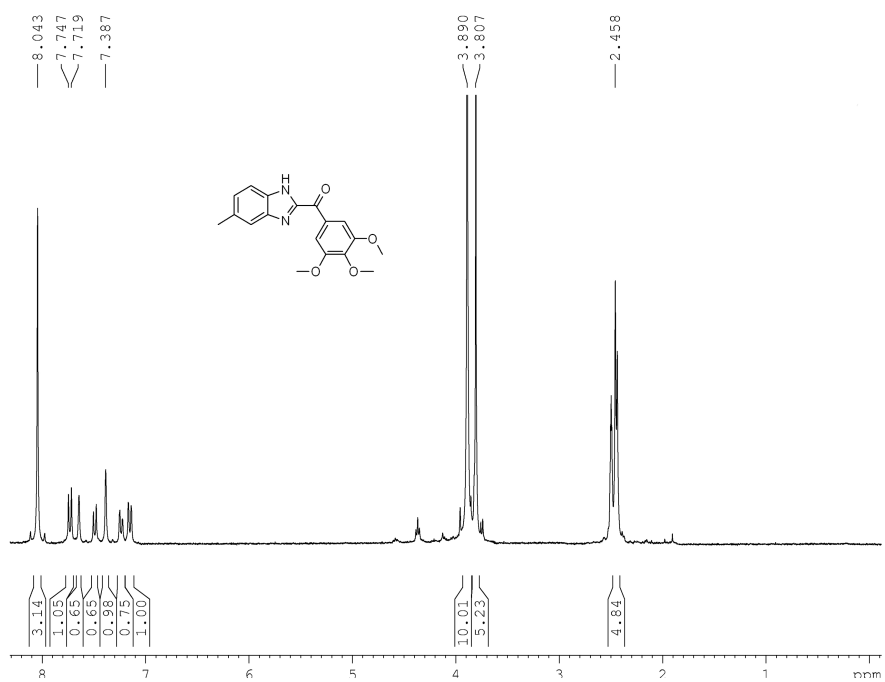

# 2-(3,4,5-Trimethoxy)benzoyl-5-methylbenzimidazole

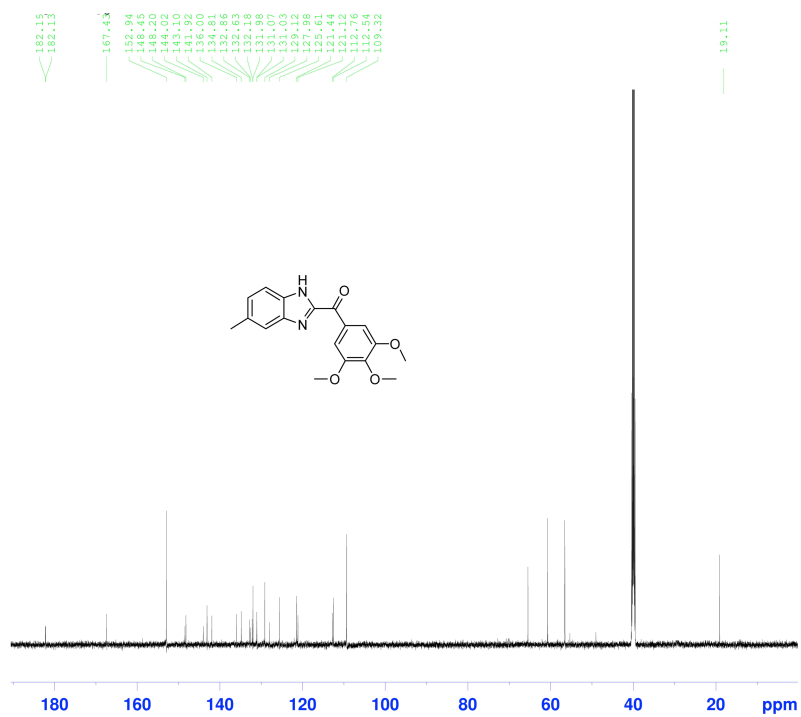



# 2-(4-Chloro)benzoyl-5-methoxybenzimidazole

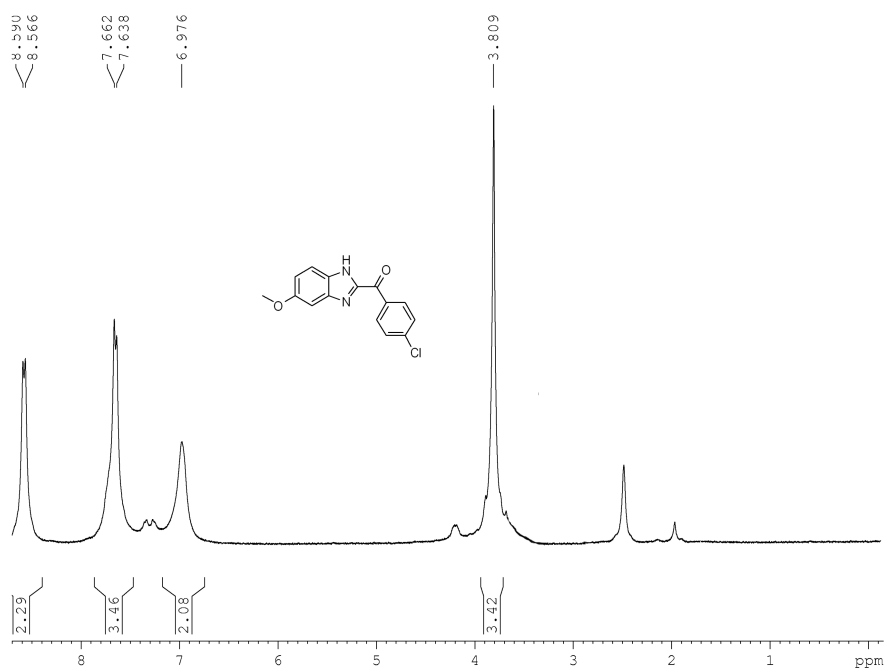

# 2-(4-Chloro)benzoyl-5-methoxybenzimidazole

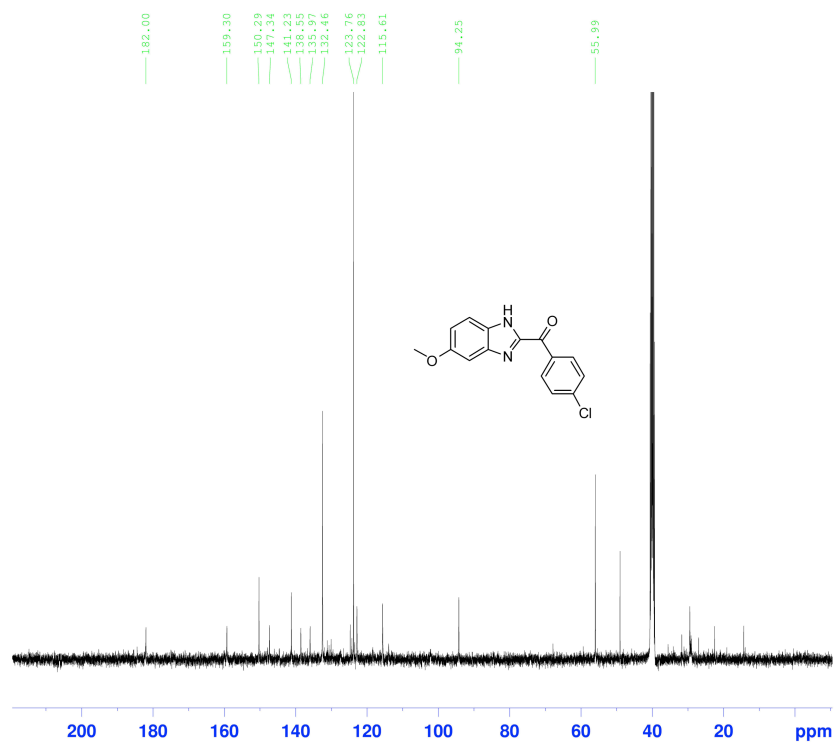

# 2-(2,4-Dichloro)benzoyl-5-methoxybenzimidazole

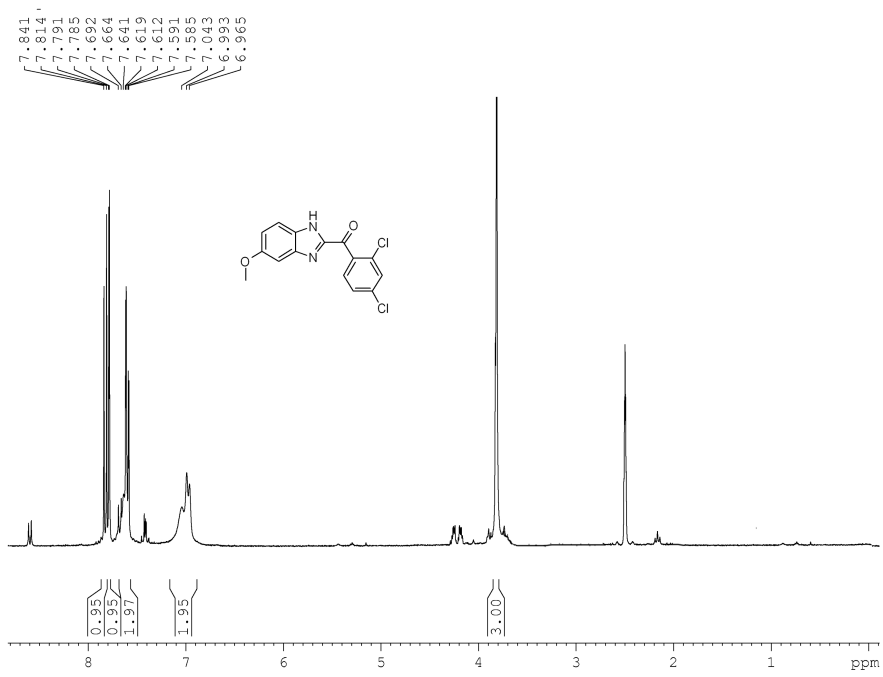

# 2-(2,4-Dichloro)benzoyl-5-methoxybenzimidazole

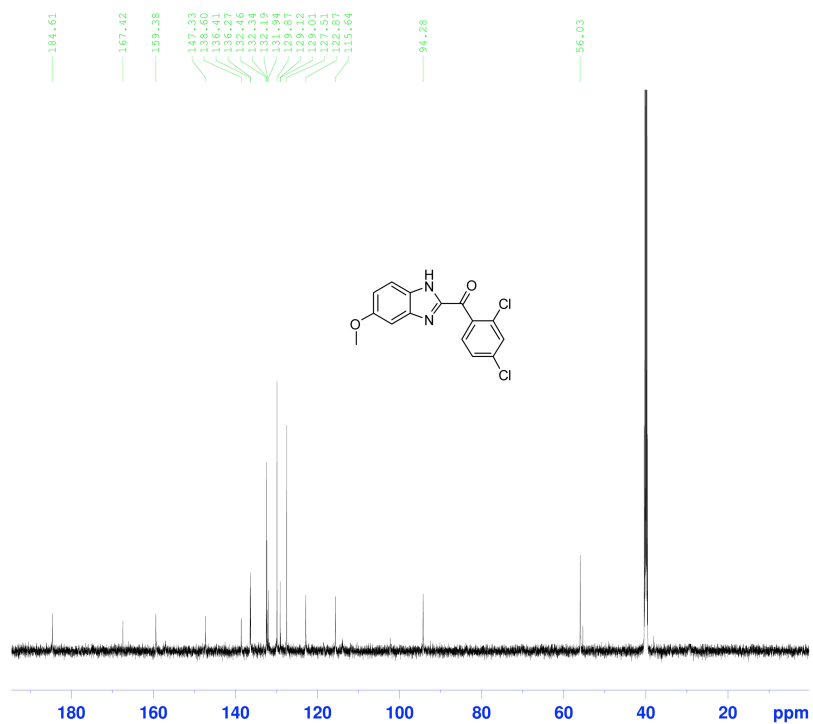

# 2-(4-Nitro)benzoyl-5-methoxybenzimidazole

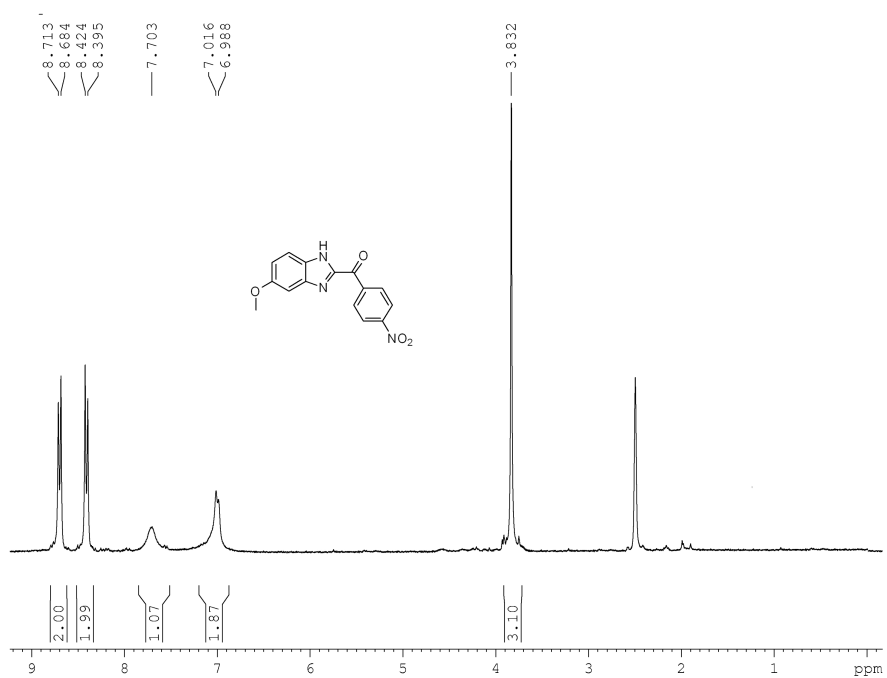

# 2-(4-Nitro)benzoyl-5-methoxybenzimidazole

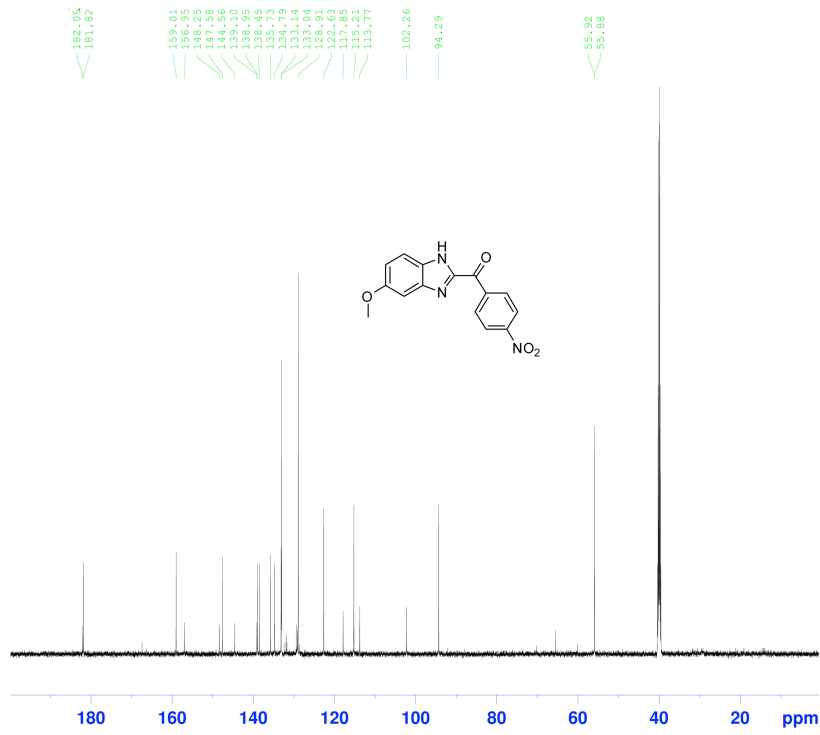

# 2-(3,4,5-Trimethoxy)benzoyl-5-methoxybenzimidazole

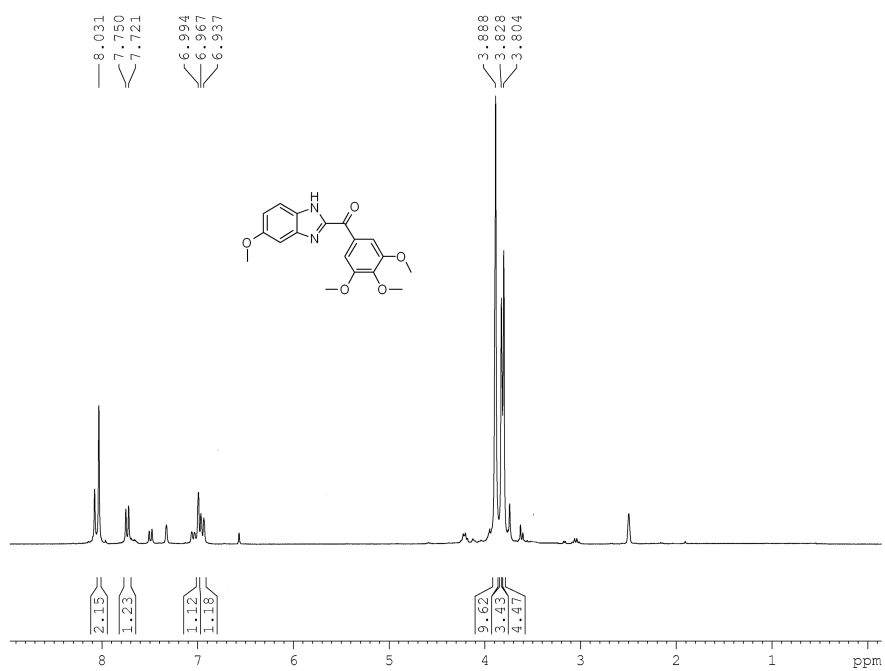

# 2-(3,4,5-Trimethoxy)benzoyl-5-methoxybenzimidazole

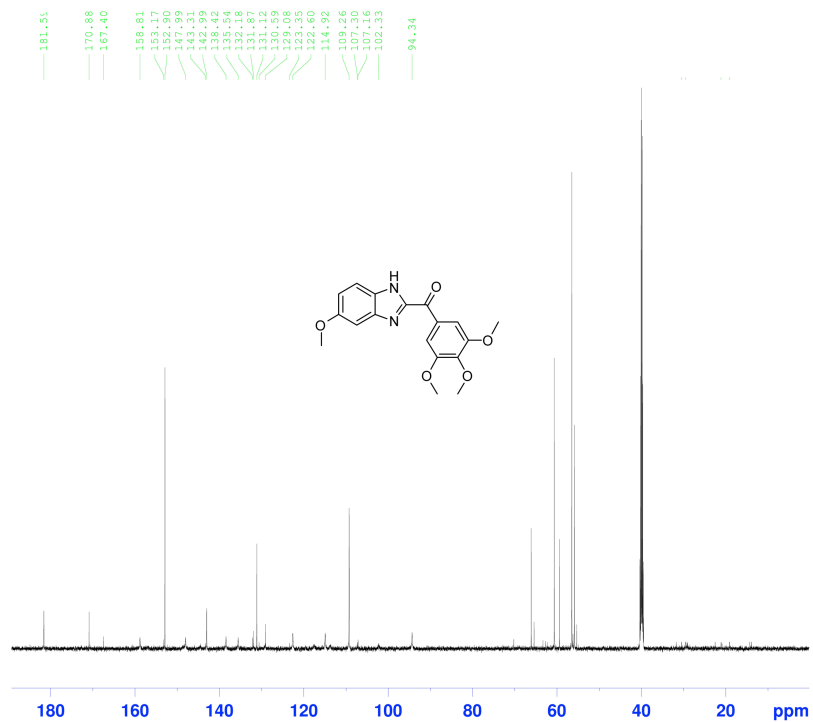



# 2-(4-Chloro)benzoyl-5-chlorobenzimidazole

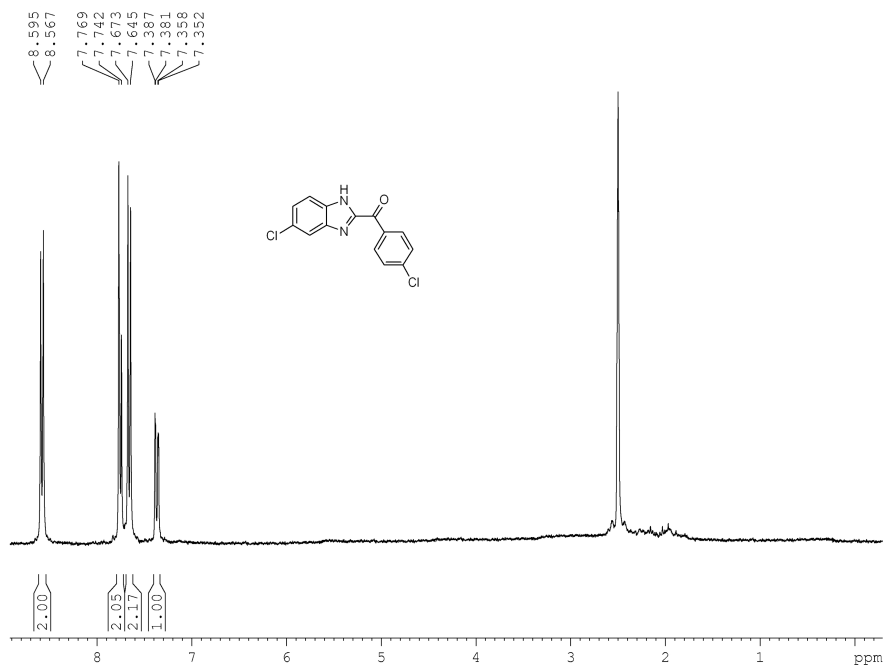

# 2-(4-Chloro)benzoyl-5-chlorobenzimidazole

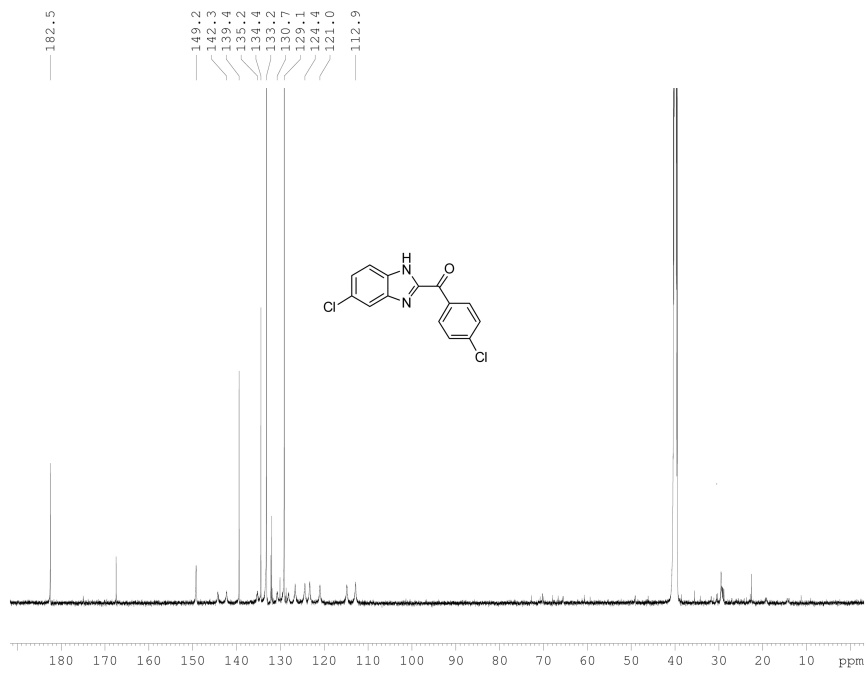

# 2-(2,4-Dichloro)benzoyl-5-chlorobenzimidazole

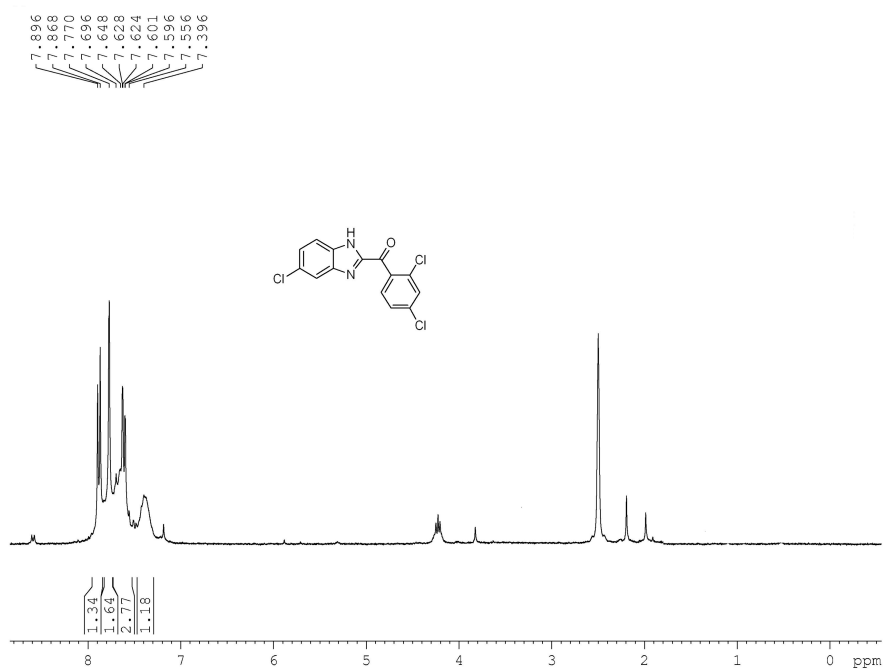

# 2-(2,4-Dichlorobenzoyl)-5-chlorobenzimidazole

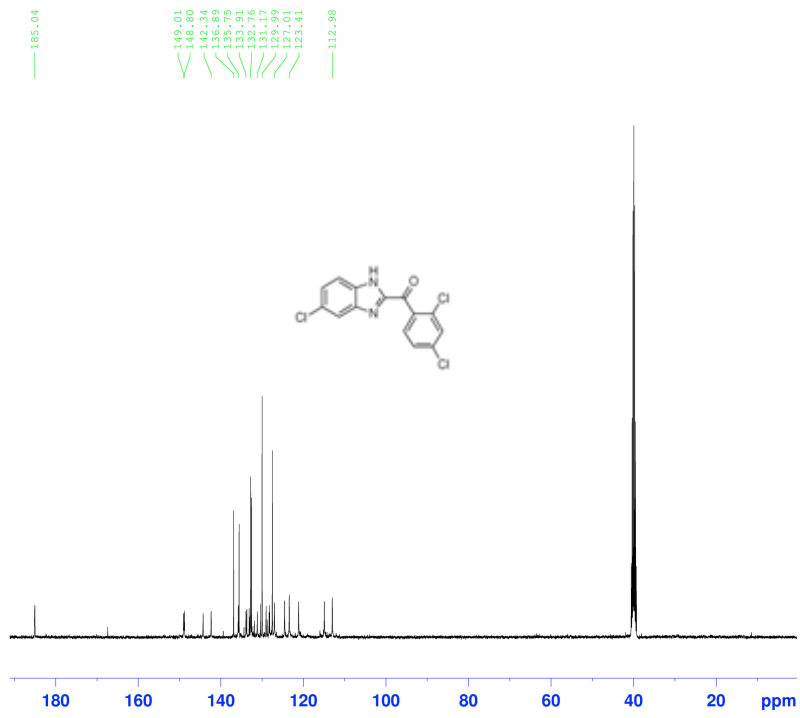

2-(4-Nitro)benzoyl-5-chlorobenzimidazole

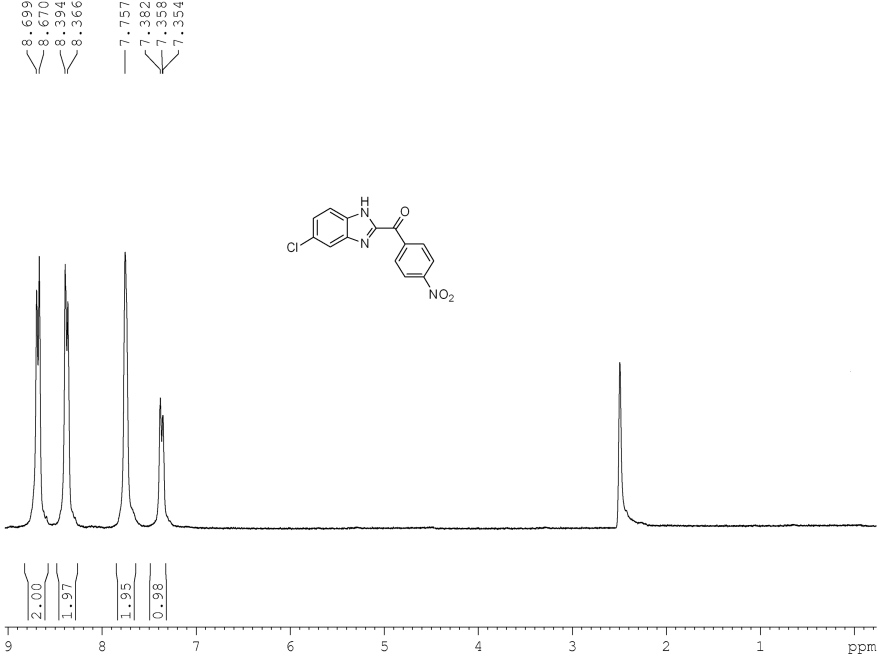

# 2-(4-Nitro)benzoyl-5-chlorobenzimidazole

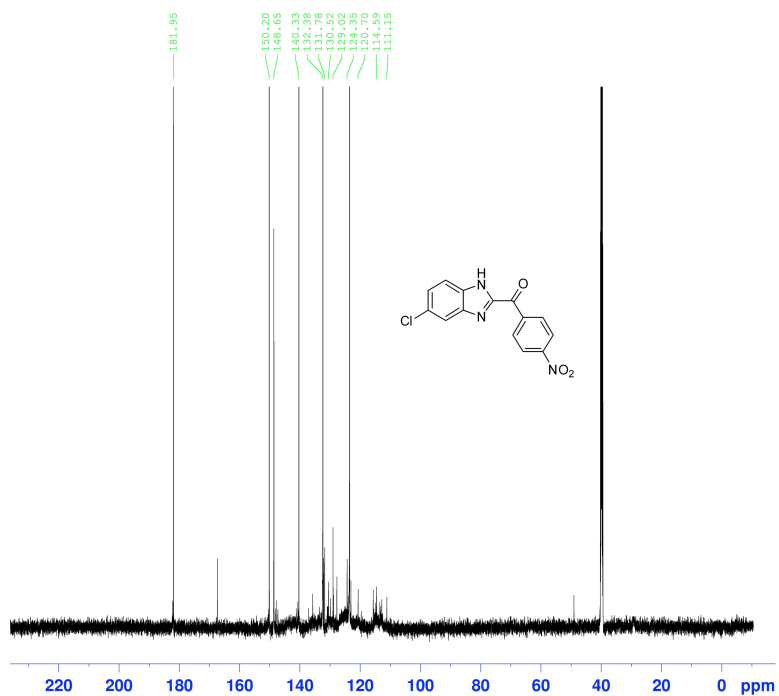

# 2-(3,4,5-Trimethoxy)benzoyl-5-chlorobenzimidazole

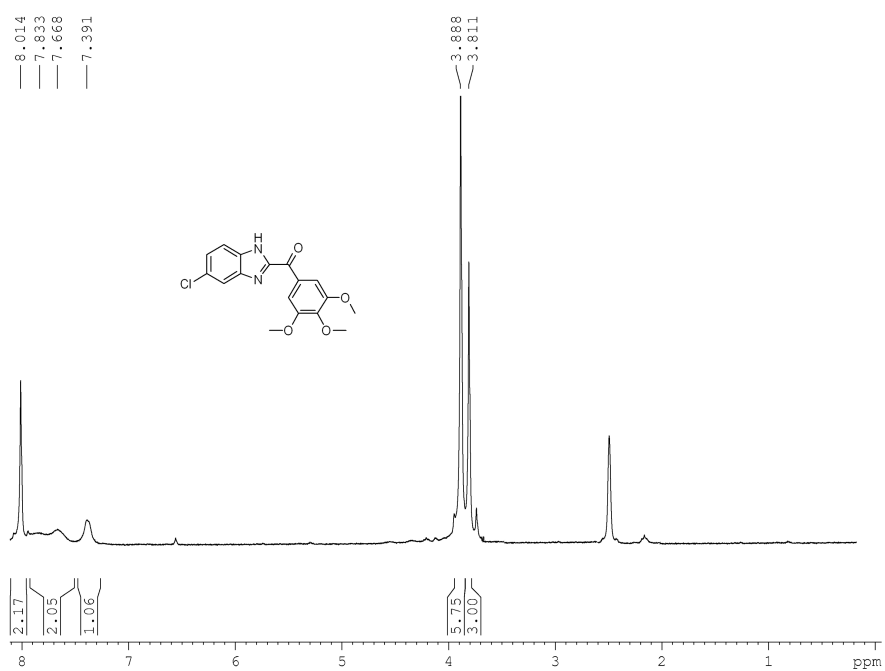

# 2-(3,4,5-Trimethoxybenzoyl)-5-chlorobenzimidazole

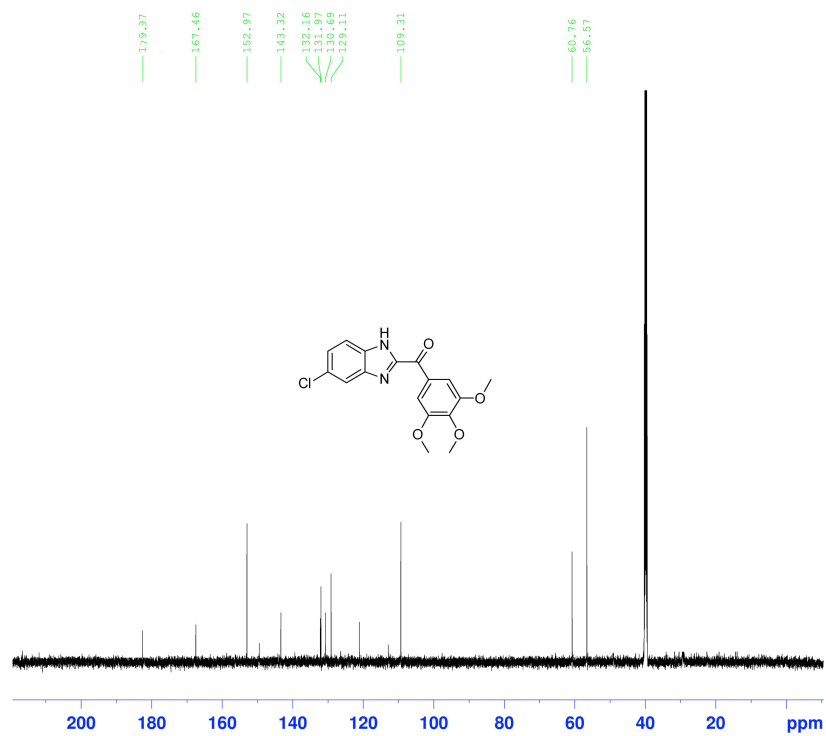



# 2-(4-Chloro)benzoylbenzoxazole

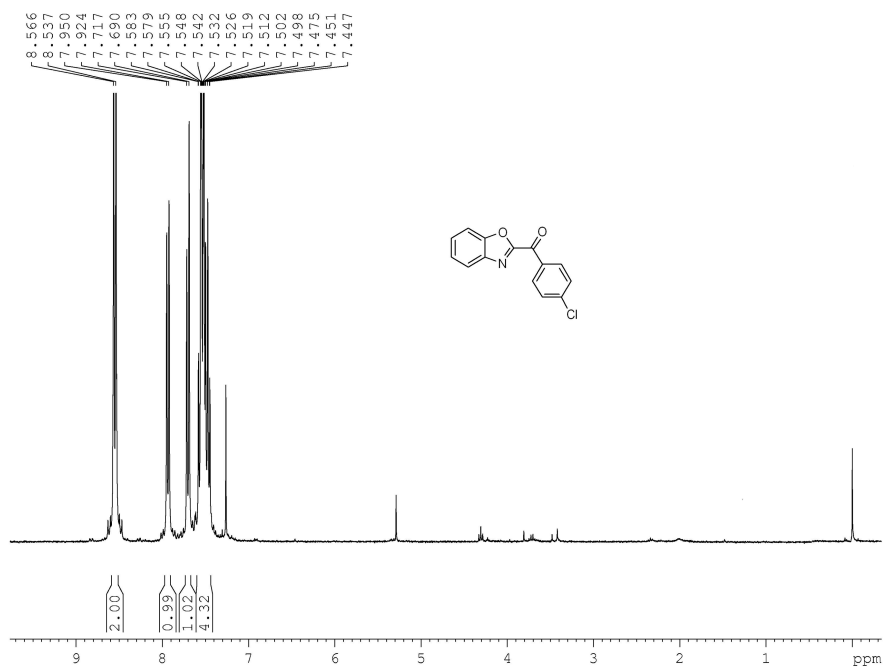

# 2-(4-Chloro)benzoylbenzoxazole

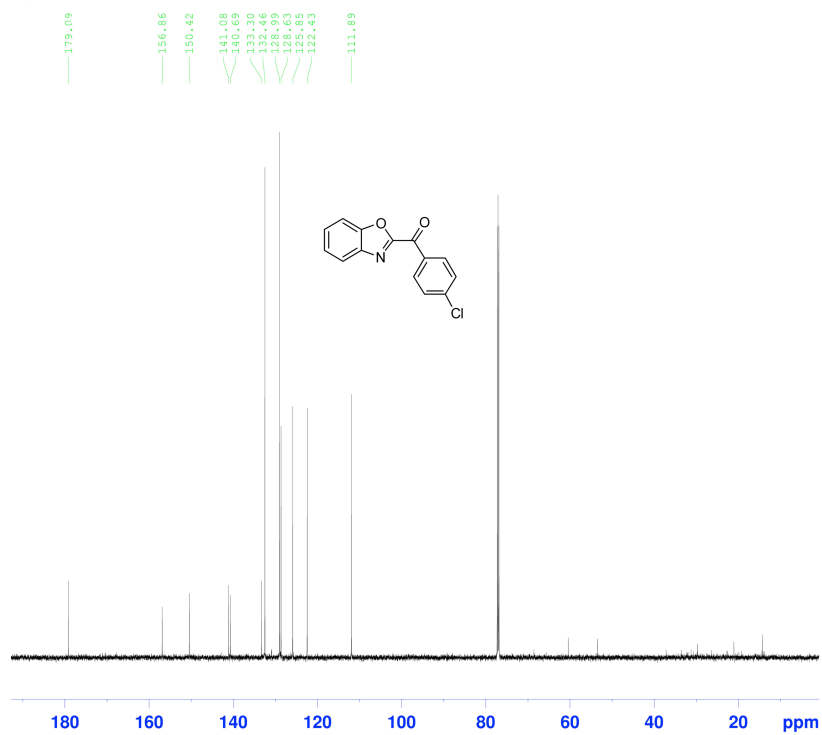

2-(2,4-Dichloro)benzoylbenzoxazole

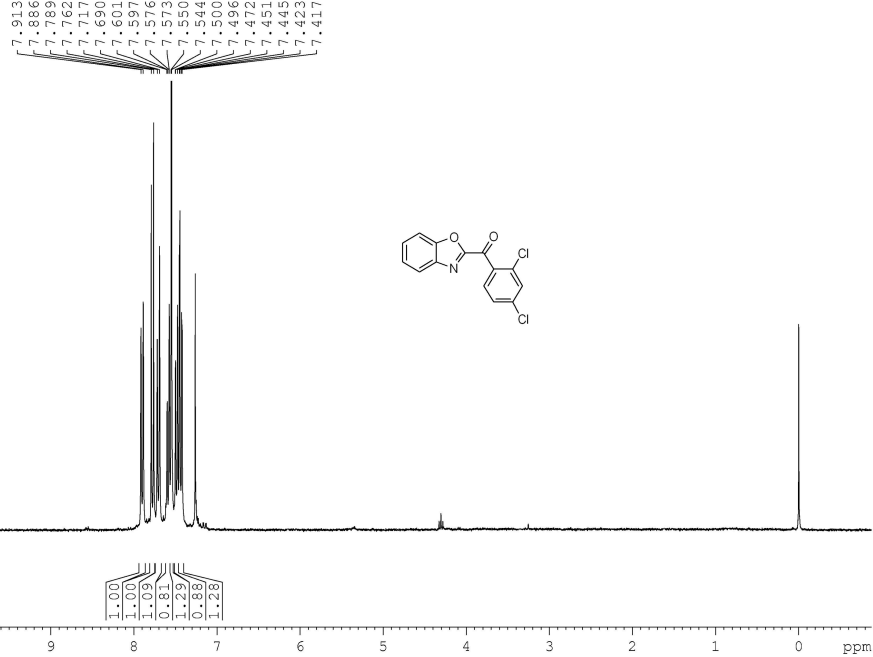

2-(2,4-Dichloro)benzoylbenzoxazole

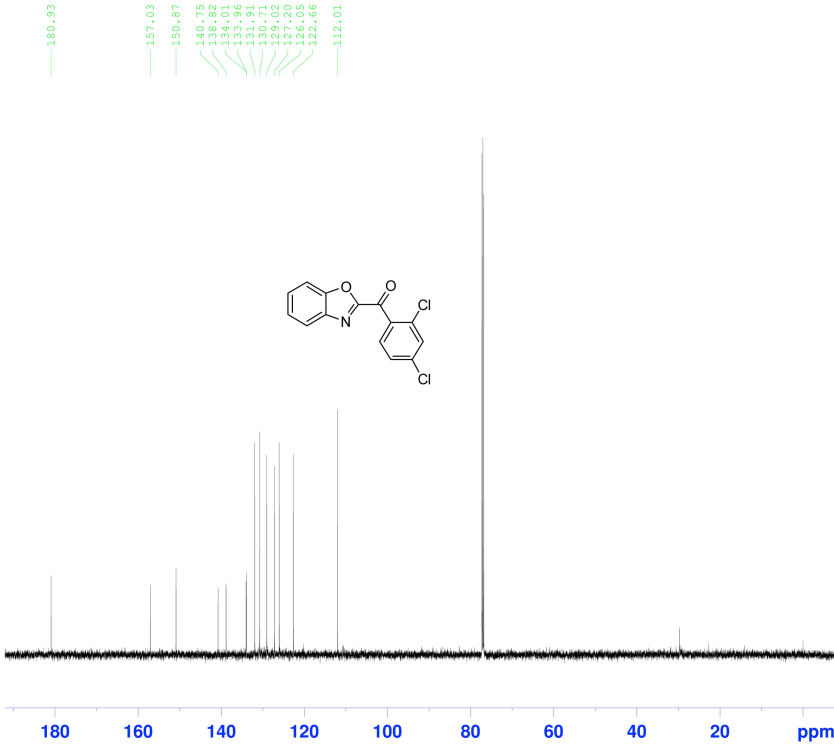

# 2-(4-Nitro)benzoylbenzoxazole

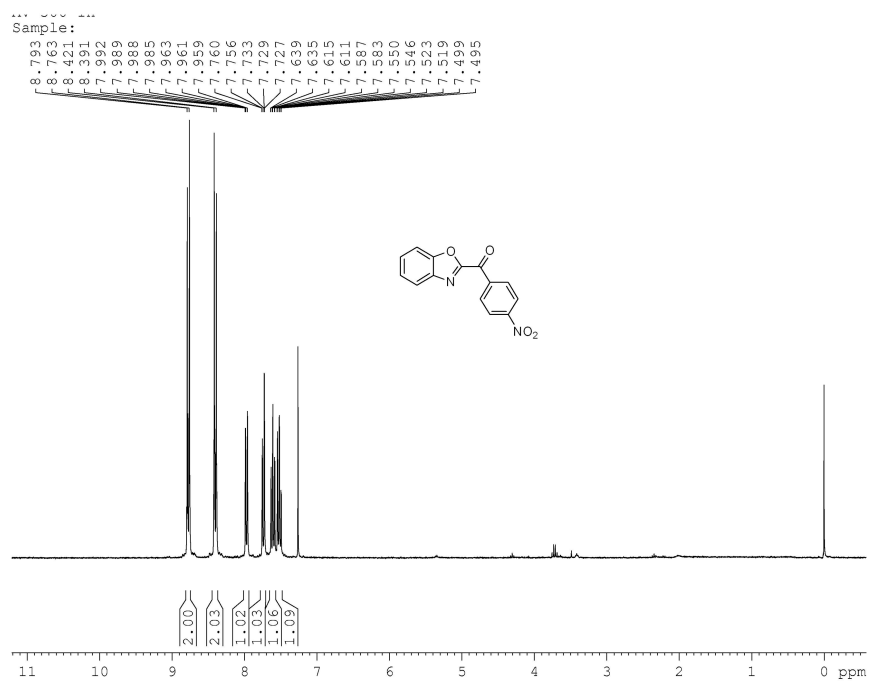

# 2-(4-Nitro)benzoylbenzoxazole

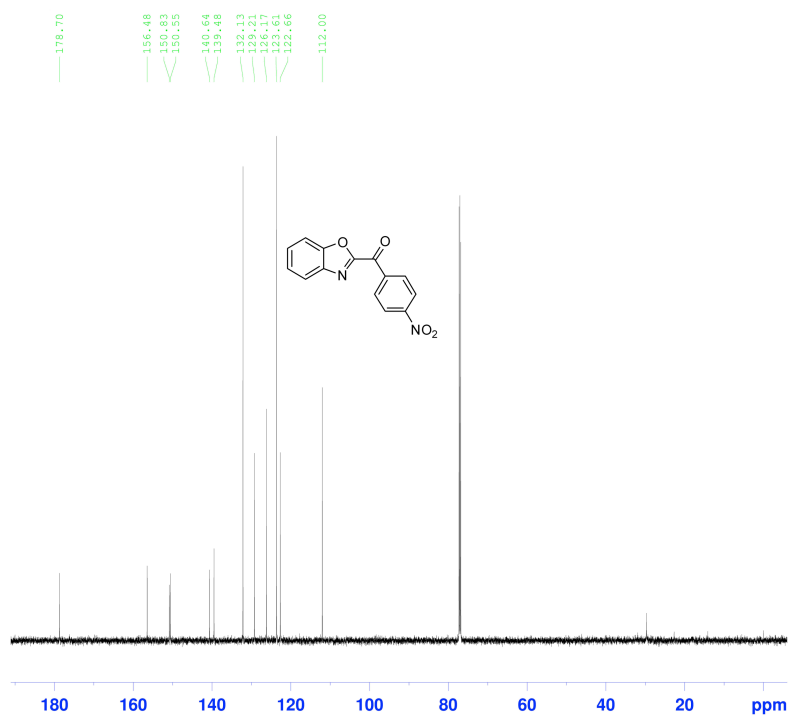

2-(3,4,5-Trimethoxy)benzoylbenzoxazole

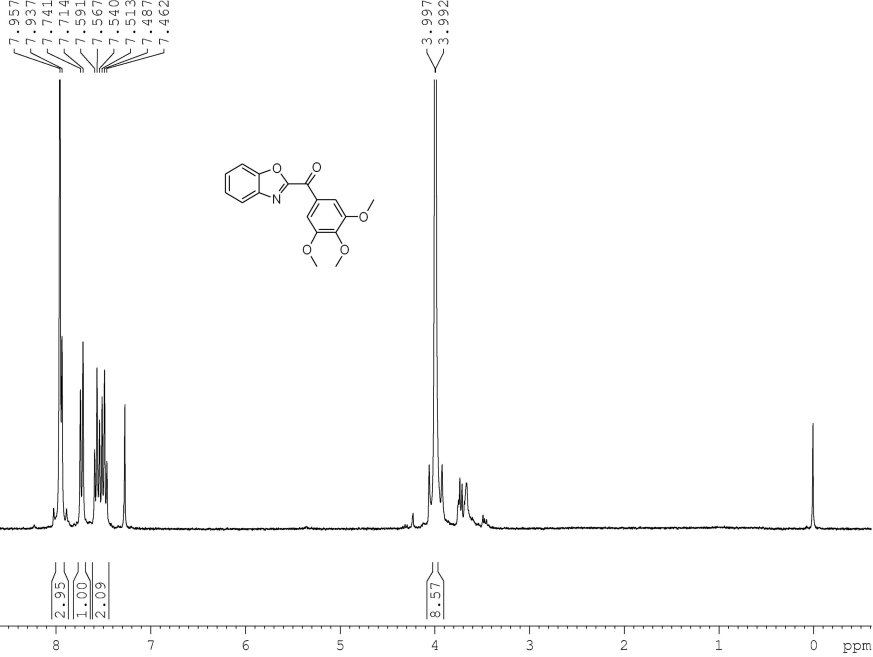

# 2-(3,4,5-Trimethoxy)benzoylbenzoxazole

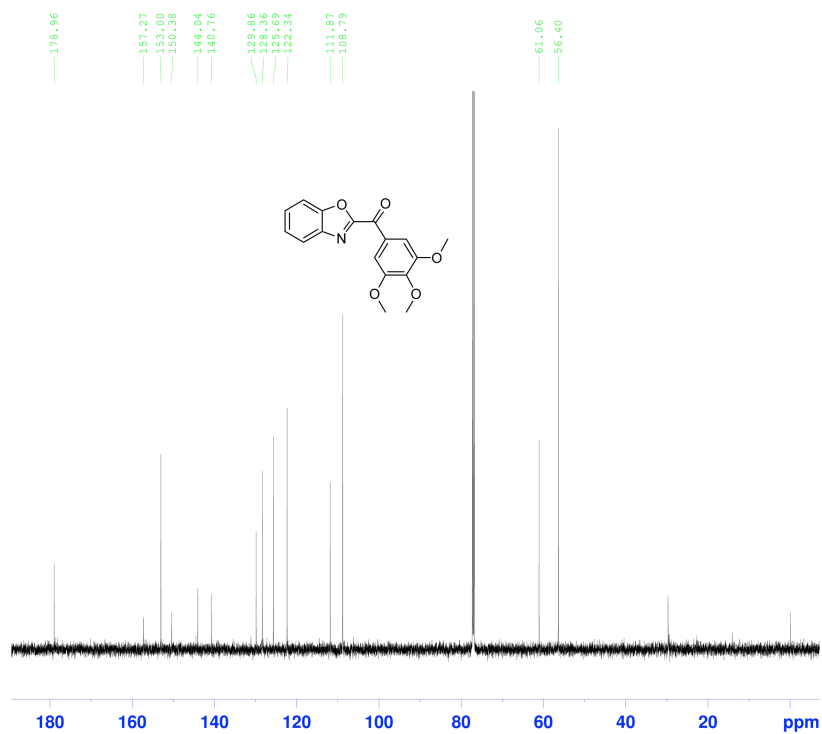



# 2-(4-Chloro)benzoyl-5-methylbenzoxazole

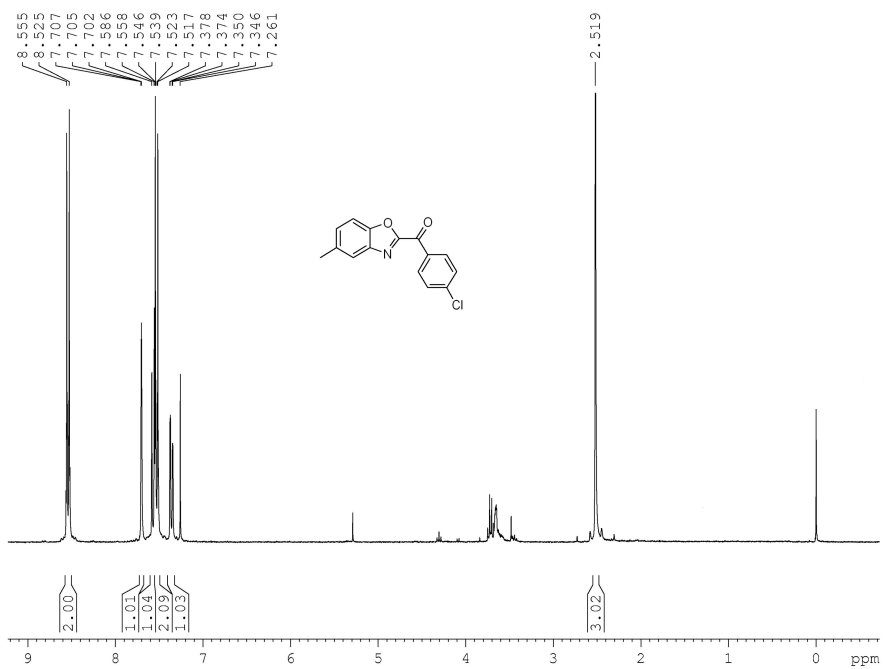

# 2-(4-Chloro)benzoyl-5-methylbenzoxazole

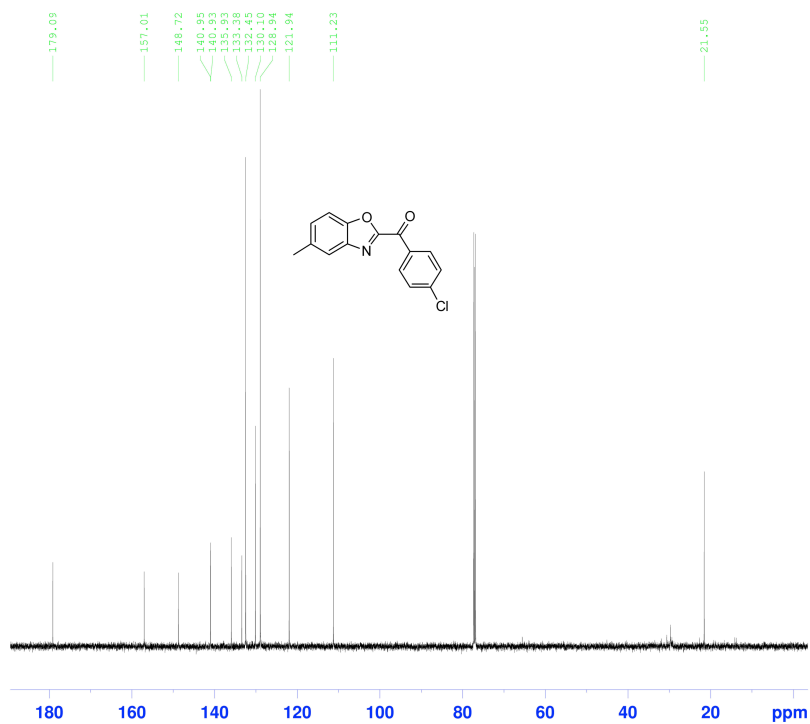

2-(2,4-Dichloro)benzoyl-5-methylbenzoxazole

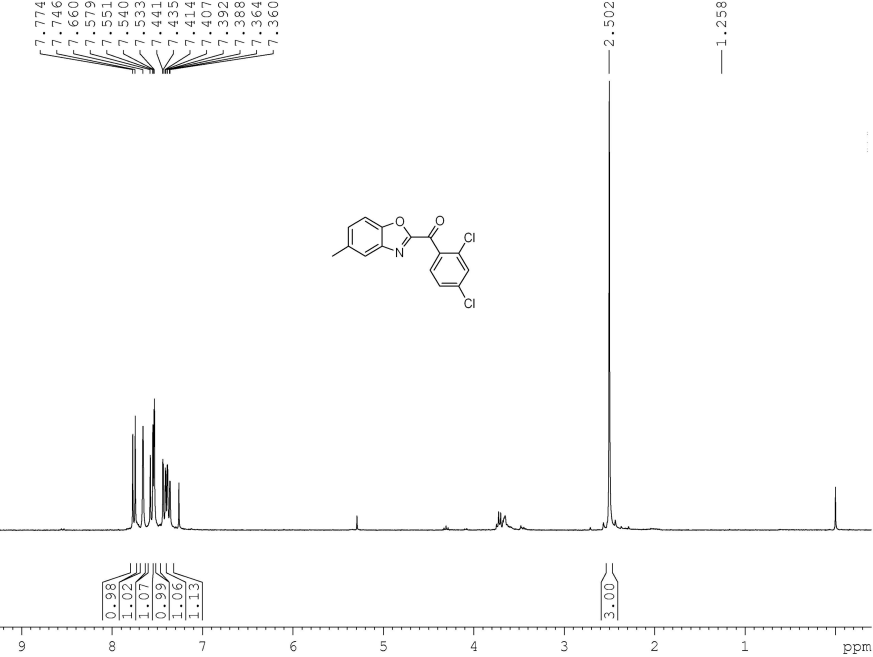

# 2-(2,4-Dichloro)benzoyl-5-methylbenzoxazole

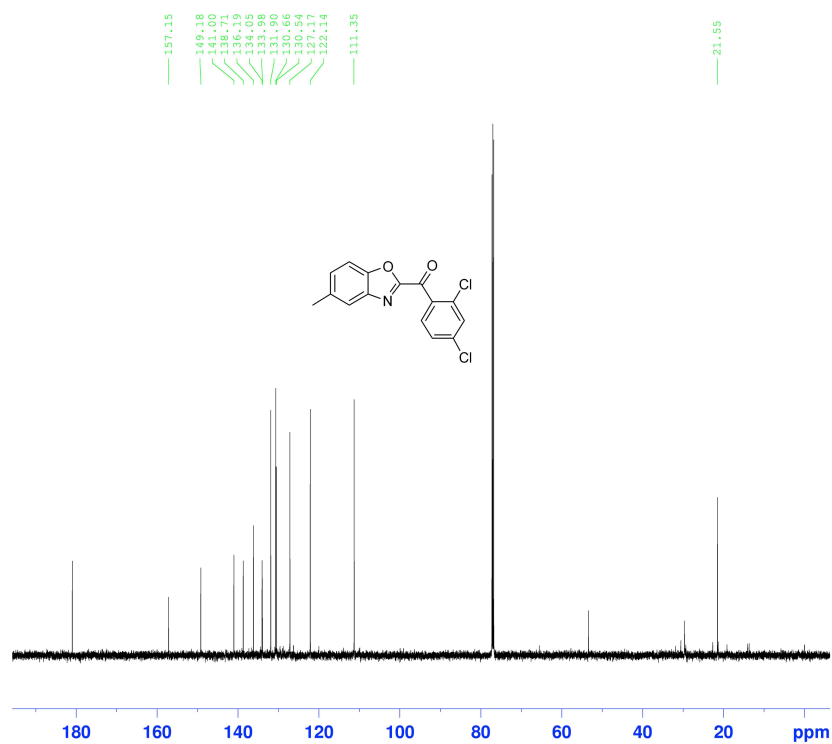

# 2-(3,4,5-Trimethoxy)benzoyl-5-methylbenzoxazole

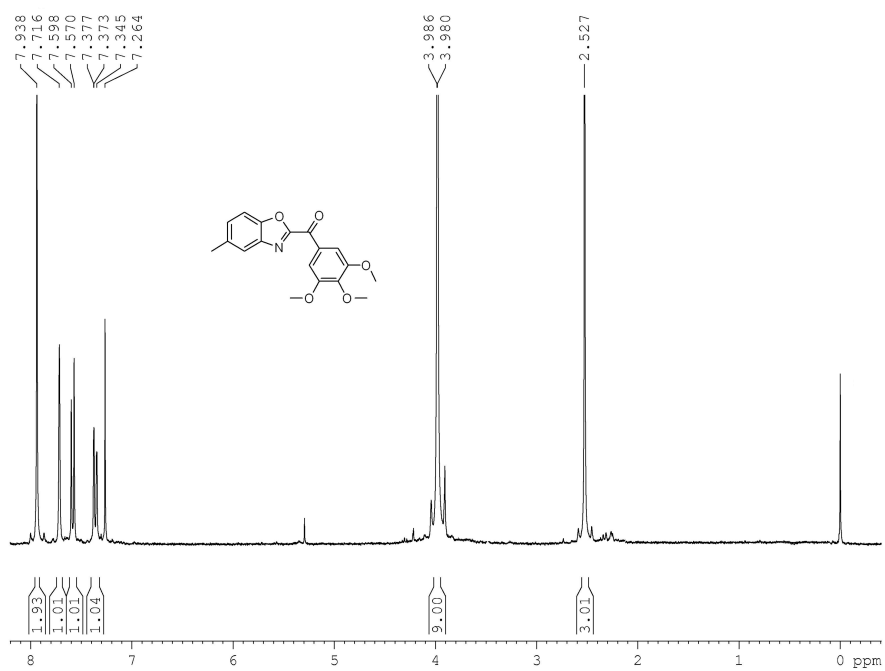

# 2-(3,4,5-Trimethoxy)benzoyl-5-methylbenzoxazole

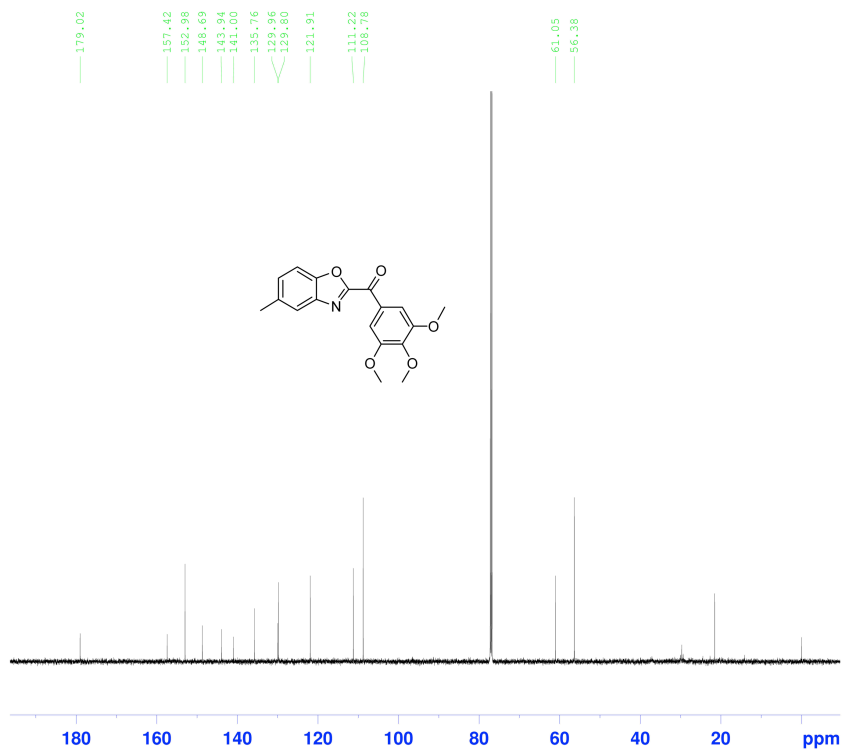

# 2-(4-Chloro)benzoyl-5-chlorobenzoxazole

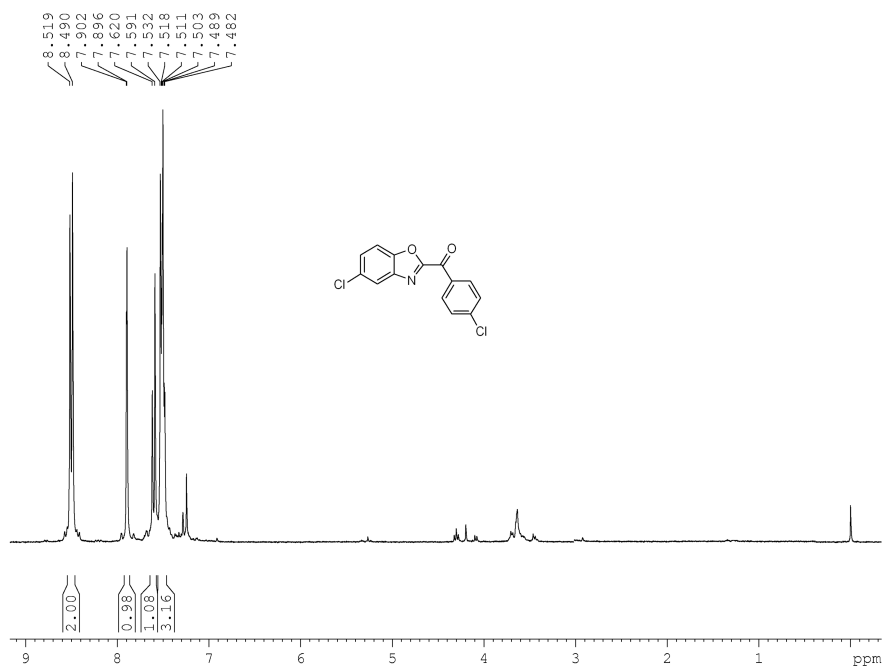

# 2-(4-Chloro)benzoyl-5-chlorobenzoxazole

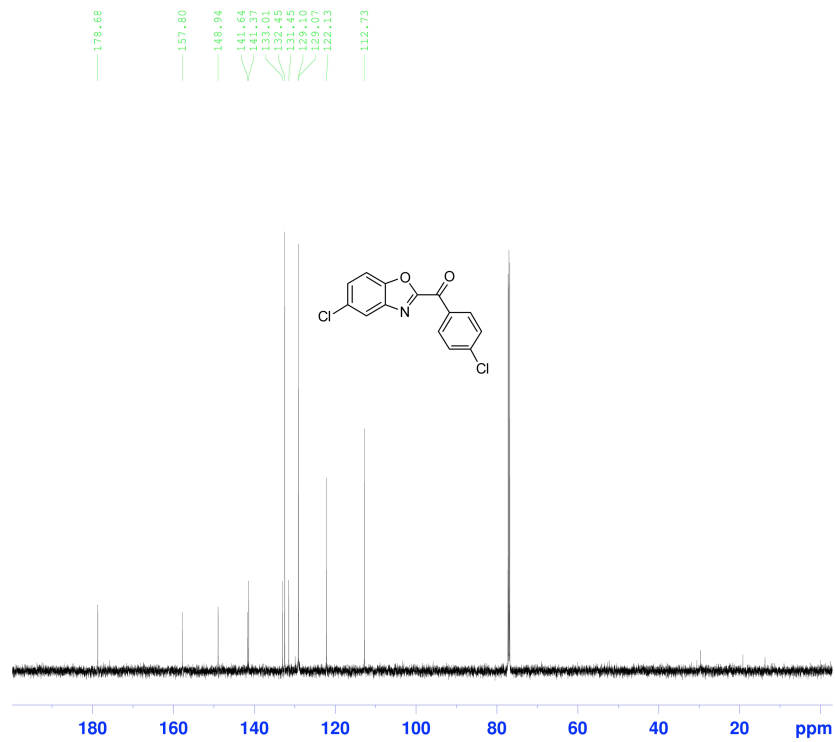



# 2-(3,4,5-Trimethoxy)benzoyl-5-chlorobenzoxazole

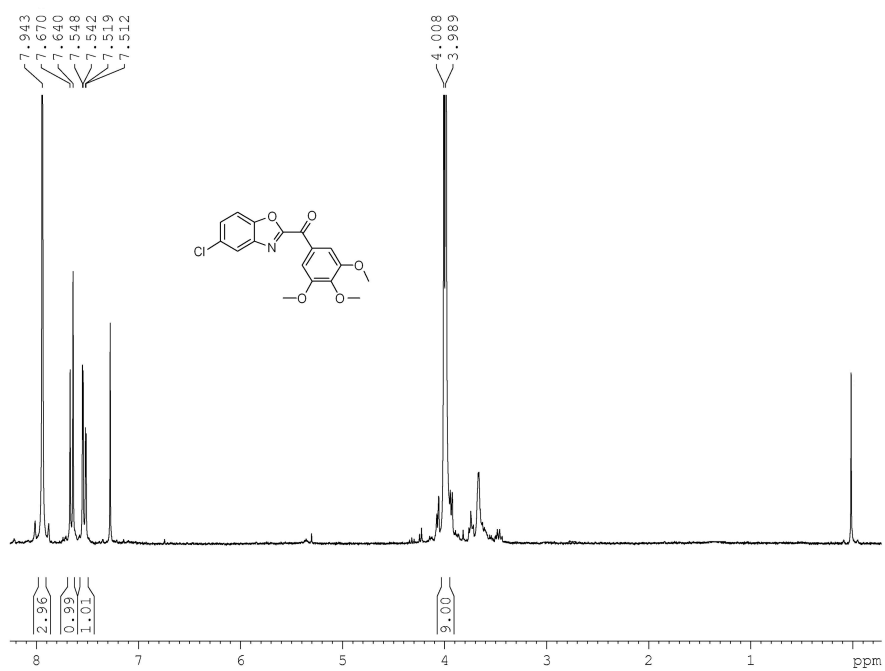

# 2-(3,4,5-Trimethoxy)benzoyl-5-chlorobenzoxazole

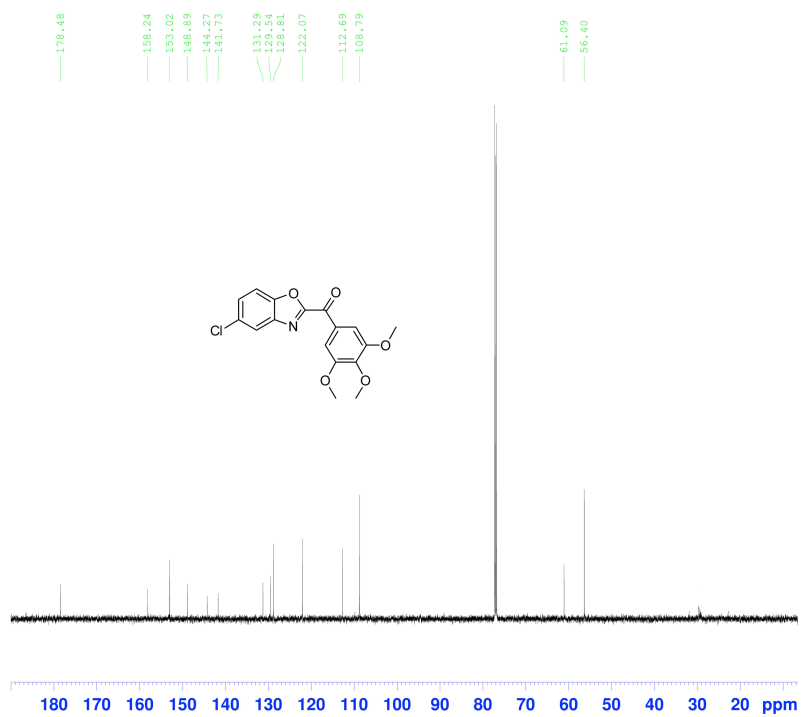

Supplement: srep10360-s1.pdf [file srep10360-s1.pdf]
